# Supplementary material for: Iodine and Nickel Ions Adsorption by Conjugated Copolymers Bearing Repeating Units of Dicyclopentapyrenyl and Various Thiophene Derivatives
Source: MDPI journal article supplement (doi:10.3390/polym15204153), 2023-10-19
Supplement: s1 [file s1]

## Supporting Information

### **Iodine and Nickel Ions Adsorption by Conjugated Copolymers Bearing Repeating Units of Dicyclopentapyrenyl and Various Thiophene Derivatives**

Suchetha Shetty,<sup>1,2</sup> Noorullah Baig,<sup>1,2</sup> Sk Abdul Wahed,<sup>3</sup> Atikur Hassan,<sup>3</sup> Neeladri Das<sup>3</sup> and Bassam Alameddine<sup>1,2,\*</sup>

<sup>1</sup> Department of Mathematics and Natural Sciences, Gulf University for Science and Technology, Kuwait.

<sup>2</sup> Functional Materials Group, Gulf University for Science and Technology, Kuwait.

<sup>3</sup> Department of Chemistry, Indian Institute of Technology Patna, Patna, 801106, Bihar, India; atikurhassan@gmail.com (A.H.); neeladri@iitp.ac.in (N.D.)

Tel: +965 2530 7111.

E-mail address: alameddine.b@gust.edu.kw

## Contents

|                                                                         |                 |
|-------------------------------------------------------------------------|-----------------|
| Synthesis of <b>3d</b>                                                  | (i)             |
| CO <sub>2</sub> gas uptake studies                                      | (ii)            |
| <sup>1</sup> H NMR spectrum of <b>3a-d</b> , <b>TPM</b> , <b>TPP1-3</b> | Figures S1-S8   |
| <sup>13</sup> C NMR spectrum of <b>3a-d</b> , <b>TPM</b> , <b>TPP1</b>  | Figures S9-S14  |
| FTIR spectrum of <b>3a-d</b> , <b>TPM</b> , <b>TPP1-3</b>               | Figures S15-S22 |
| EI-MS spectrum of <b>3a-d</b> and <b>TPM</b>                            | Figures S23-S27 |
| TGA thermograms of <b>TPP1-3</b>                                        | Figure S28      |
| Normalized GPC chromatogram of <b>TPP1</b>                              | Figure S29      |
| Nitrogen adsorption and desorption isotherms of <b>TPP1-3</b>           | Figure S30      |
| Kinetic studies of <b>TPP1-3@I<sub>2</sub></b>                          | Figures S31-S33 |
| UV-Vis absorption spectra of <b>TPP1@I<sub>2</sub></b> in ethanol       | Figures S34-S36 |

(i). Synthesis of 2-((4-(tert-butyl)phenyl)ethynyl)-5-hexylthiophene (**3d**)

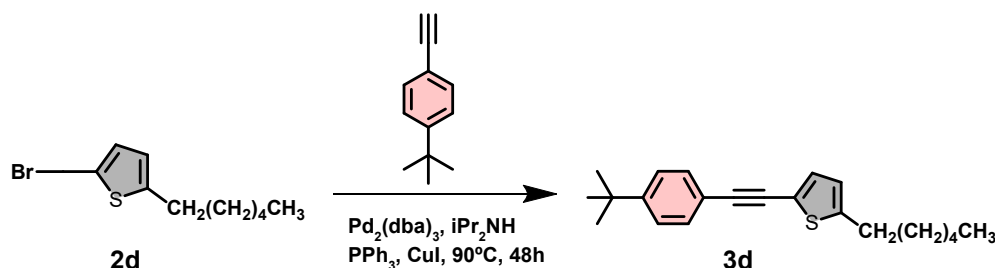

**3d** was prepared following procedure A with 2-bromo-5-hexylthiophene **2d** (0.3 g, 1.2 mmol, 1 eq.), 1-(tert-butyl)-4-ethynylbenzene **1a** (0.46 g, 2.9 mmol, 2.4 eq.)  $\text{Pd}_2(\text{dba})_3$  (6.7 mg, 0.0073 mmol, 0.6 mol%),  $\text{PPh}_3$  (28 mg, 0.1 mmol), and  $\text{CuI}$  (4.6 mg, 0.02 mmol) in 10 mL of degassed diisopropylamine ( $\text{iPr}_2\text{NH}$ ) at  $90^\circ\text{C}$  for 2 days. pale pink solid (140 mg, 93%).  $^1\text{H-NMR}$  (600 MHz,  $\text{CD}_2\text{Cl}_2$ , ppm):  $\delta$  7.76 (d, 2H,  $J = 7.8$  Hz, ArH), 7.66 (s, 2H, ArH), 7.56 (dd, 2H,  $J = 7.8, 6.6$  Hz, ArH), 7.52 (m, 4H,  $J = 3.6$  Hz, ArH), 7.45 (m, 4H, ArH), 1.55 (s, 6H,  $-\text{CH}_3$ ), 1.37 (s, 18H,  $-\text{CH}_3$ ).  $^{13}\text{C-NMR}$  (150 MHz,  $\text{CD}_2\text{Cl}_2$ , ppm):  $\delta$  154.66, 152.35, 139.20, 131.80, 131.30, 126.50, 126.09, 122.94, 120.84, 90.44, 89.98, 47.47, 35.29, 31.50, 27.32. EI-HRMS:  $m/z$  calculated for  $\text{M}^{+}$   $\text{C}_{39}\text{H}_{38}$  506.2974 found 506.2975.

(ii).  $\text{CO}_2$  gas uptake studies

The  $\text{CO}_2$  gas adsorption properties of **TPP1-3** were investigated by recording their  $\text{CO}_2$  sorption isotherms with a pressure up to one atmosphere at temperatures of 273 K and 298 K (Figures S31-S33). The  $\text{CO}_2$  uptake capacity of **TPP1** is  $12.72 \text{ mg g}^{-1}$  and  $17.86 \text{ mg g}^{-1}$  at 273 K and 298 K respectively. Furthermore, the conjugated polymers **TPP2** and **TPP3** display  $\text{CO}_2$  uptake efficiency up to  $17.53 \text{ mg g}^{-1}$  and  $18.20 \text{ mg g}^{-1}$  at 273 K and  $16.99 \text{ mg g}^{-1}$  and  $18.82 \text{ mg g}^{-1}$  at 298 K, respectively

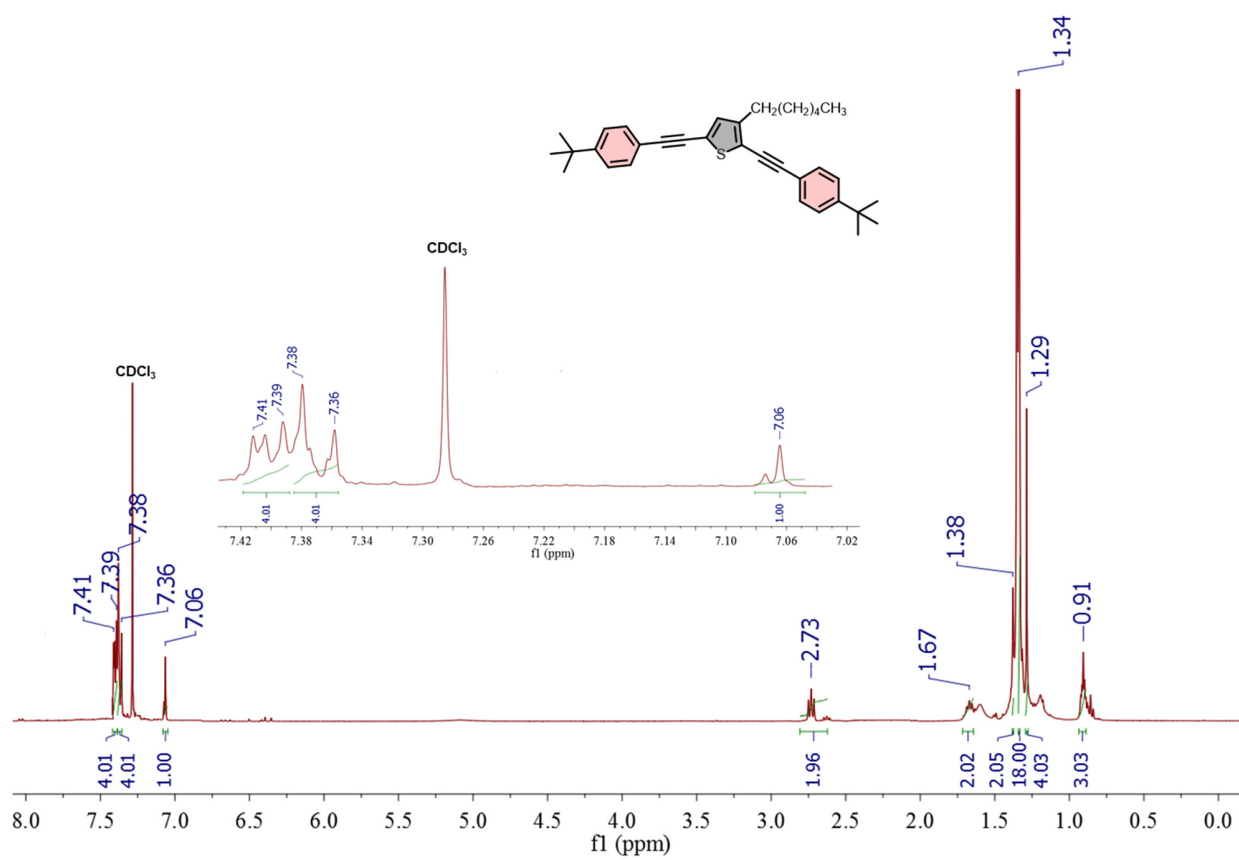

**Figure S1** <sup>1</sup>H NMR spectrum of **3a**

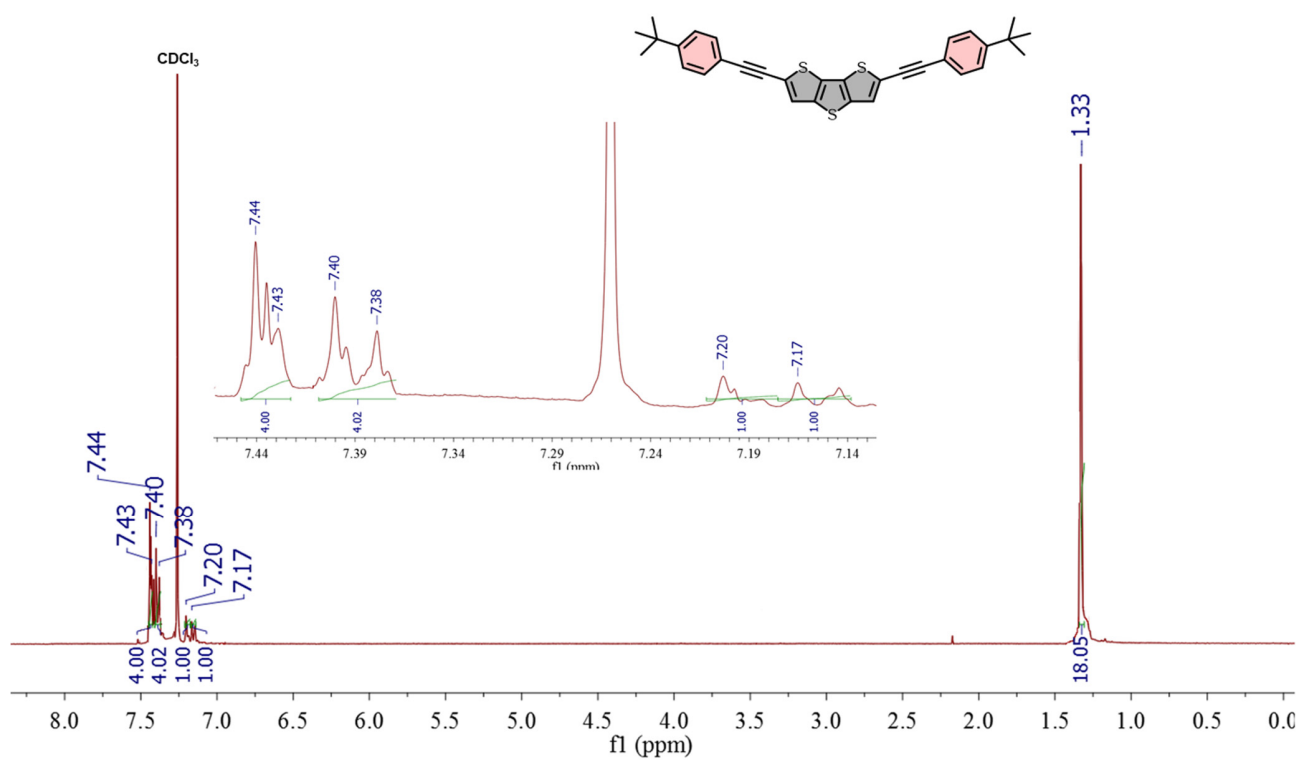

**Figure S2** <sup>1</sup>H NMR spectrum of **3b**

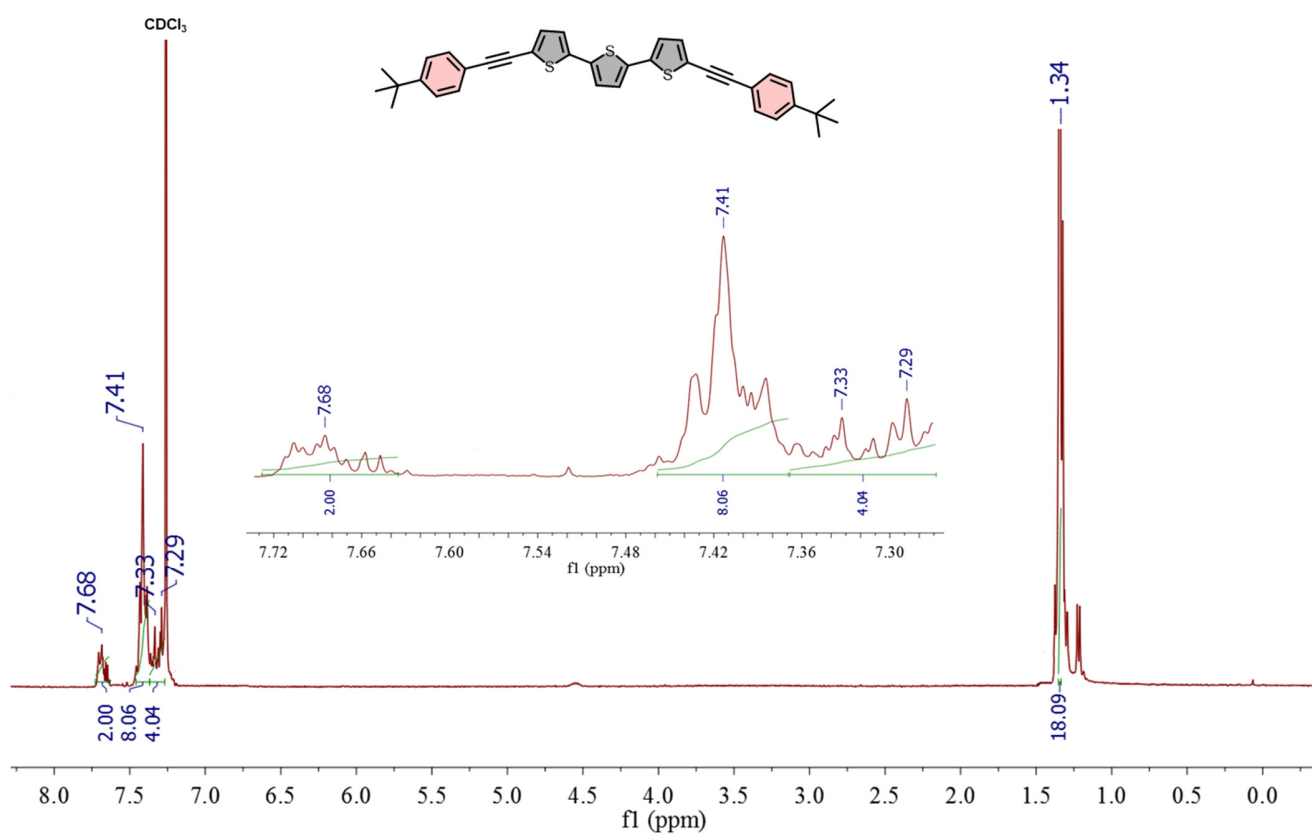

**Figure S3**  $^1\text{H}$  NMR spectrum of **3c**

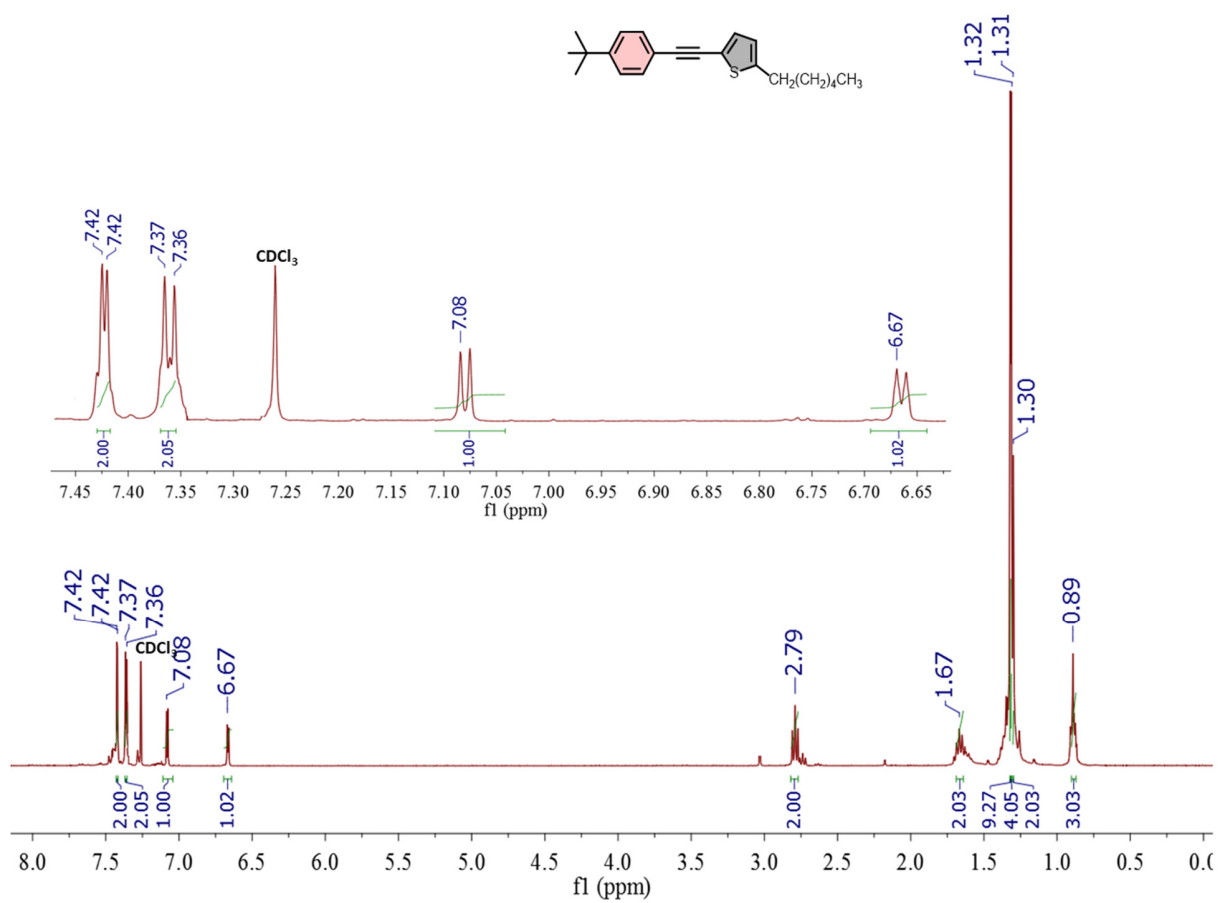

**Figure S4**  $^1\text{H}$  NMR spectrum of **3d**

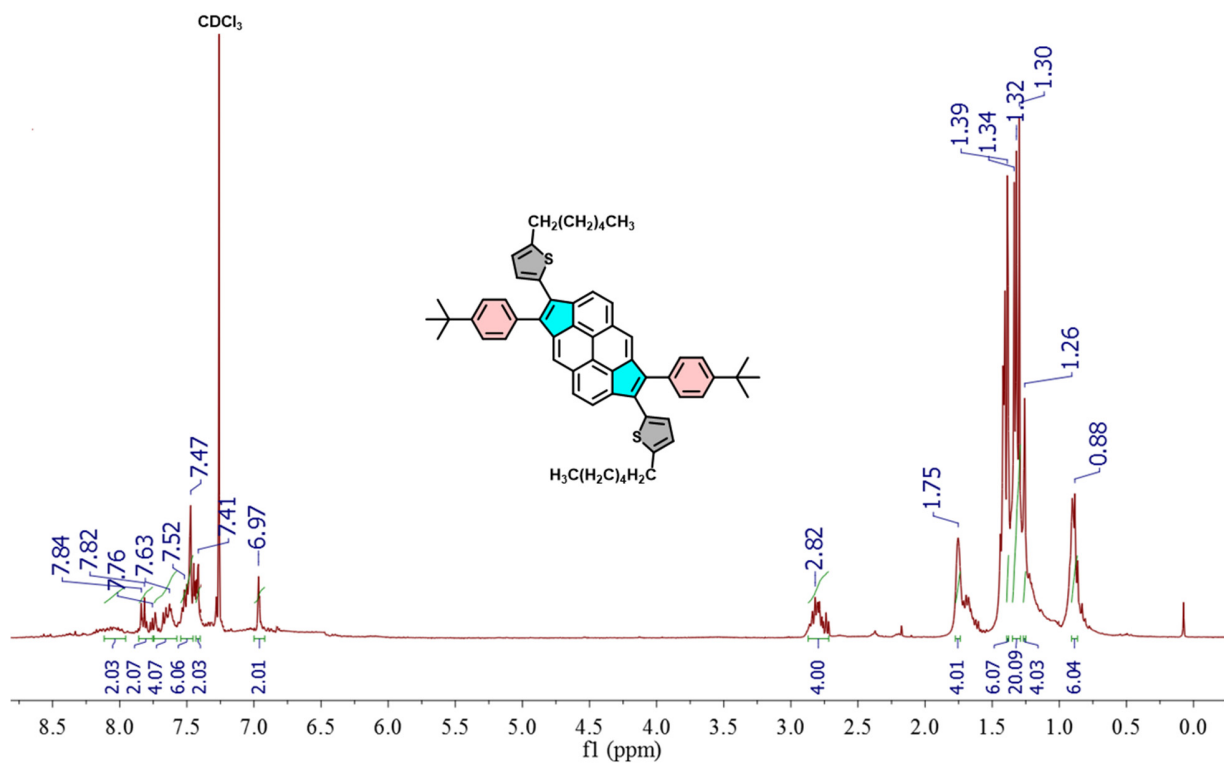

**Figure S5**  $^1\text{H}$  NMR spectrum of TPM

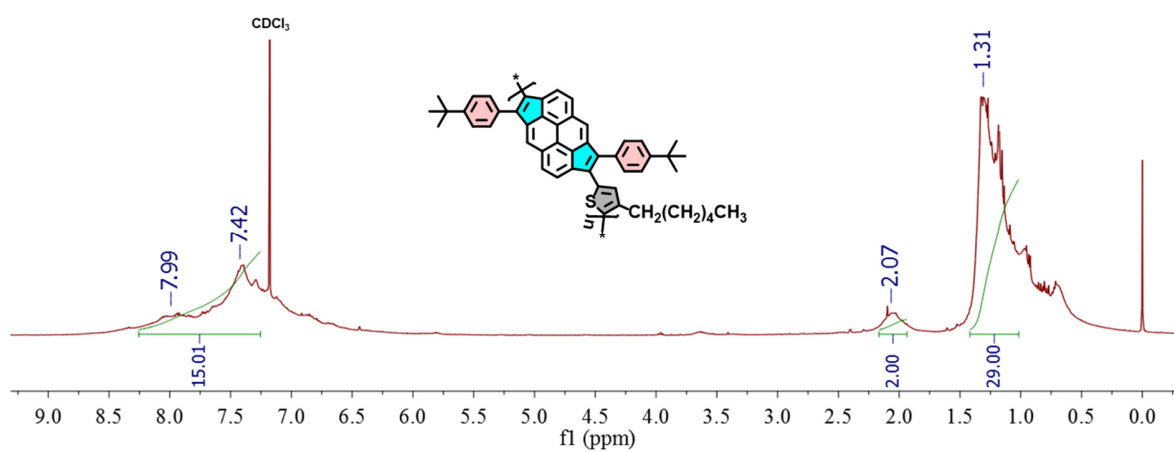

**Figure S6**  $^1\text{H}$  NMR spectrum of **TPP1**



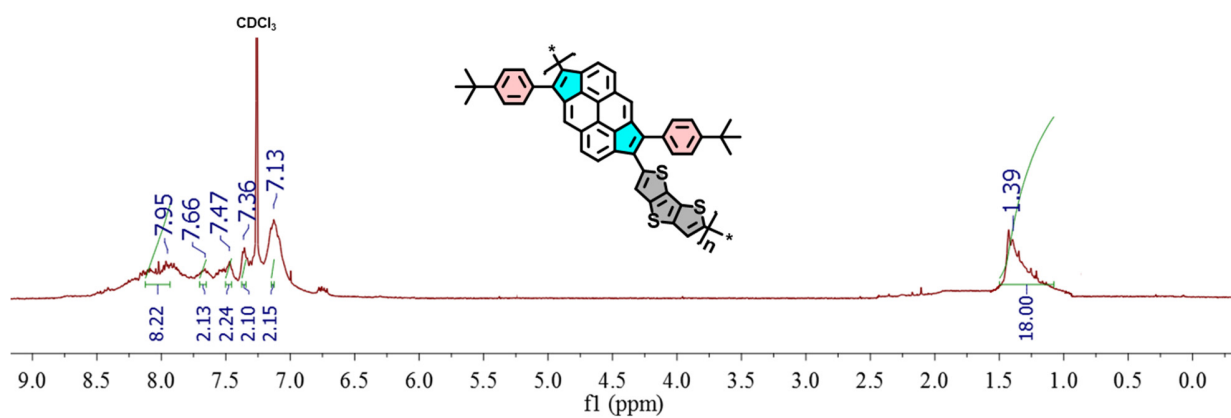

**Figure S7** <sup>1</sup>H NMR spectrum of TPP2

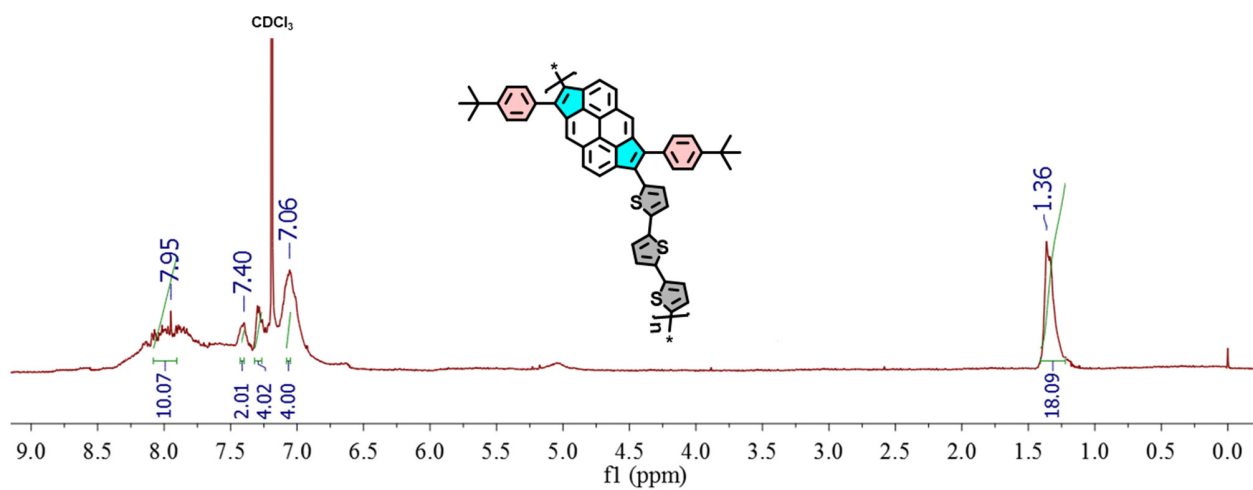

**Figure S8** <sup>1</sup>H NMR spectrum of TPP3

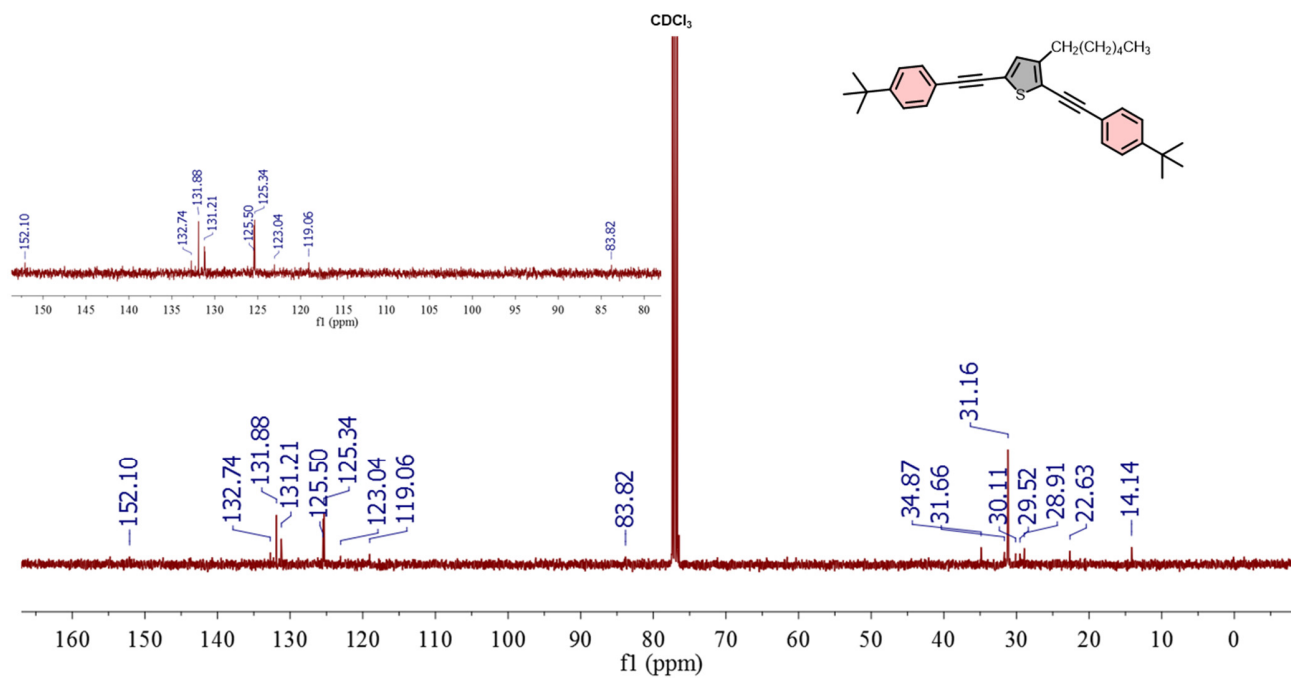

**Figure S9**  $^{13}\text{C}$  NMR spectrum of **3a**

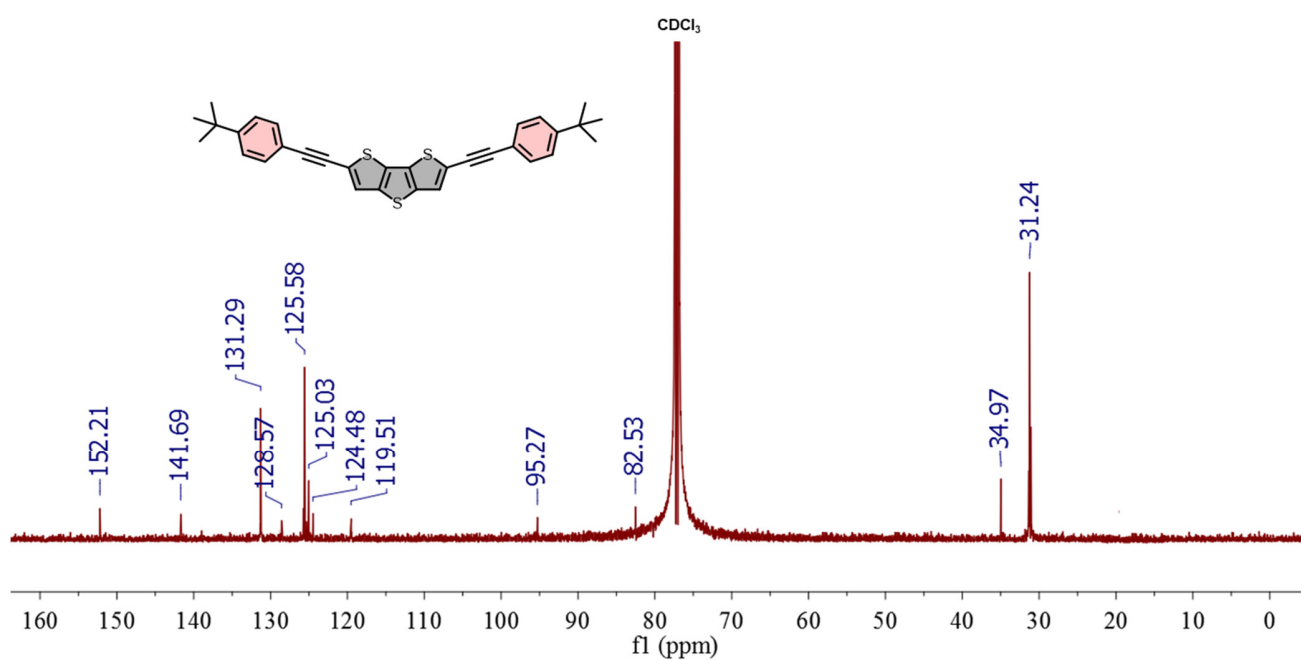

**Figure S10**  $^{13}\text{C}$  NMR spectrum of **3b**

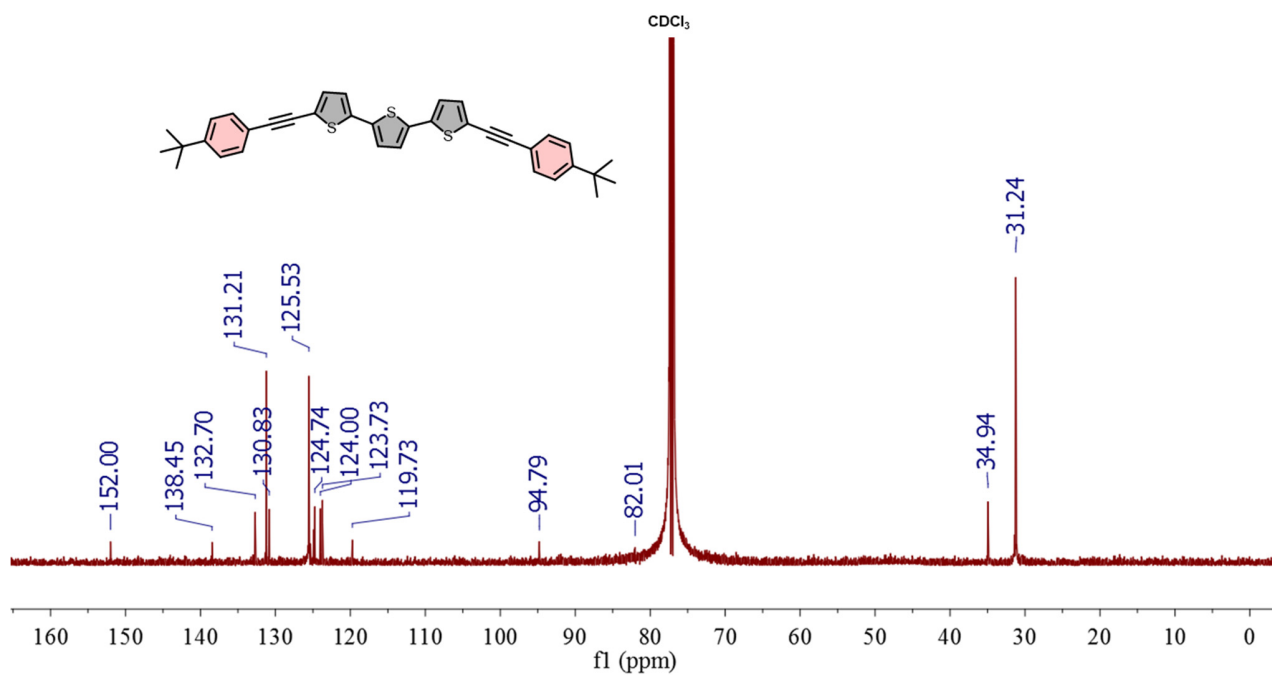

**Figure S11** <sup>13</sup>C NMR spectrum of **3c**

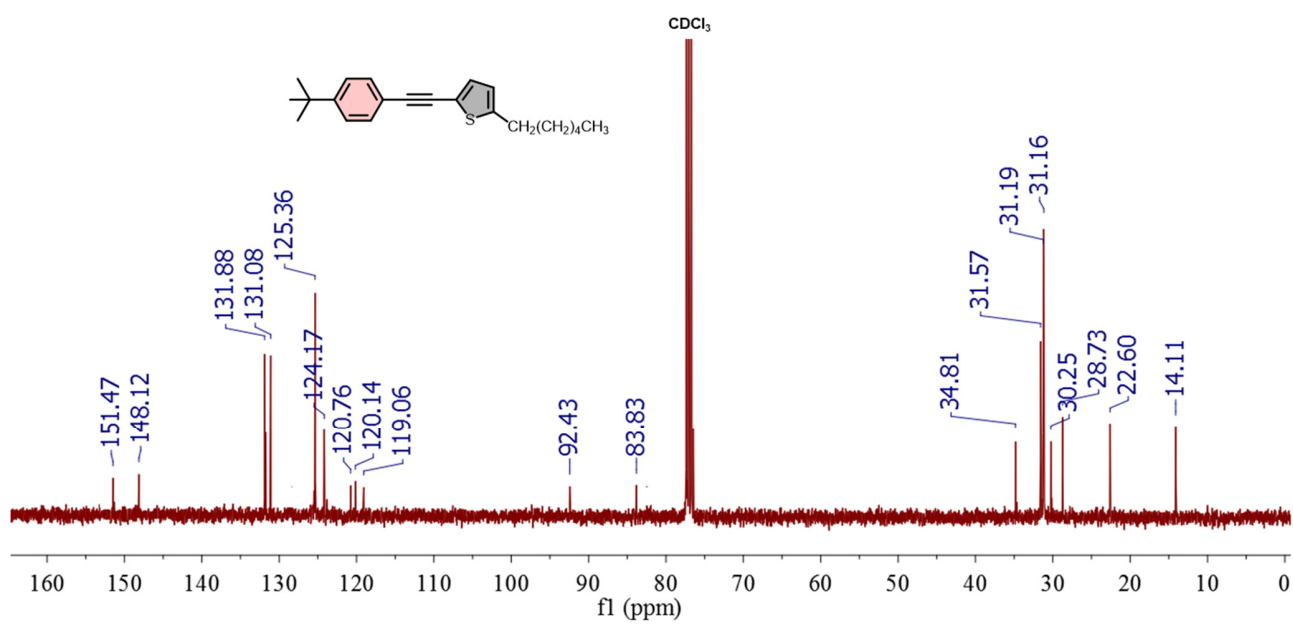

**Figure S12** <sup>13</sup>C NMR spectrum of **3d**

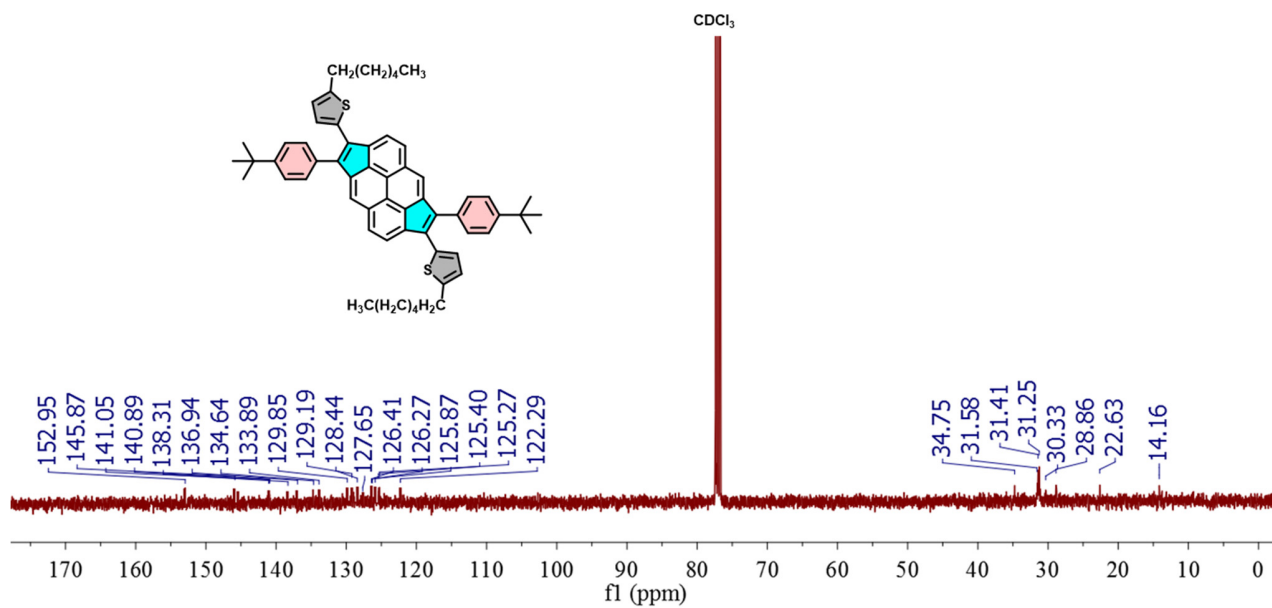

**Figure S13**  $^{13}\text{C}$  NMR spectrum of TPM

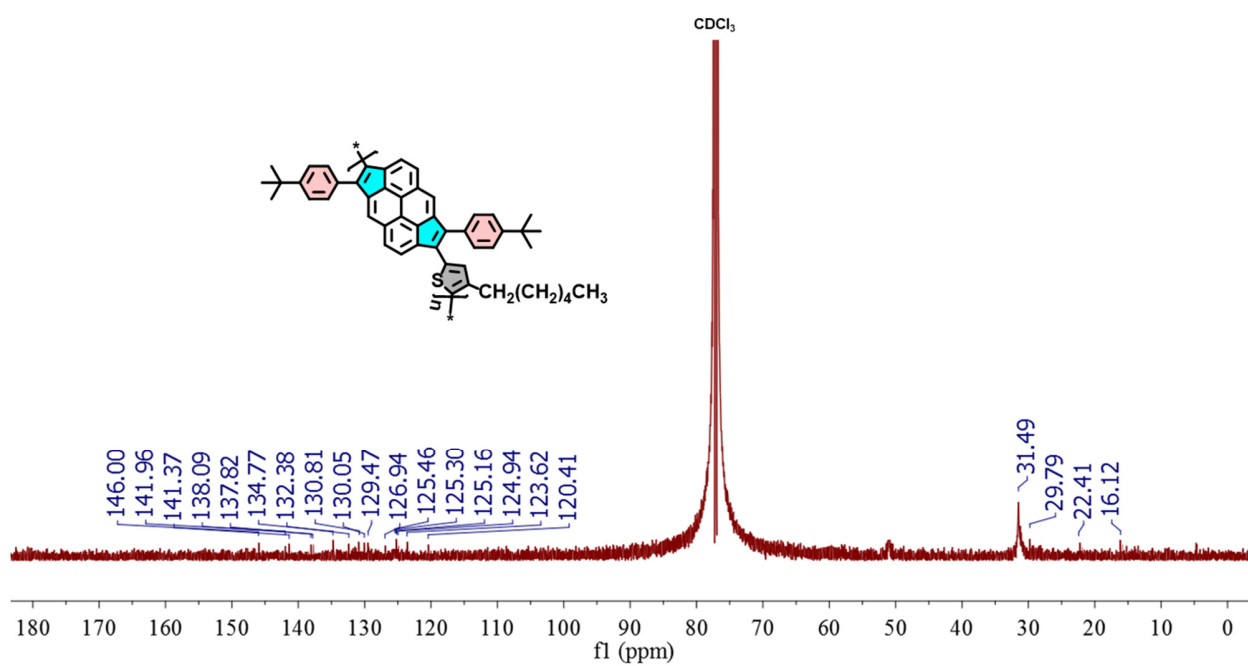

**Figure S14**  $^{13}\text{C}$  NMR spectrum of TPP1

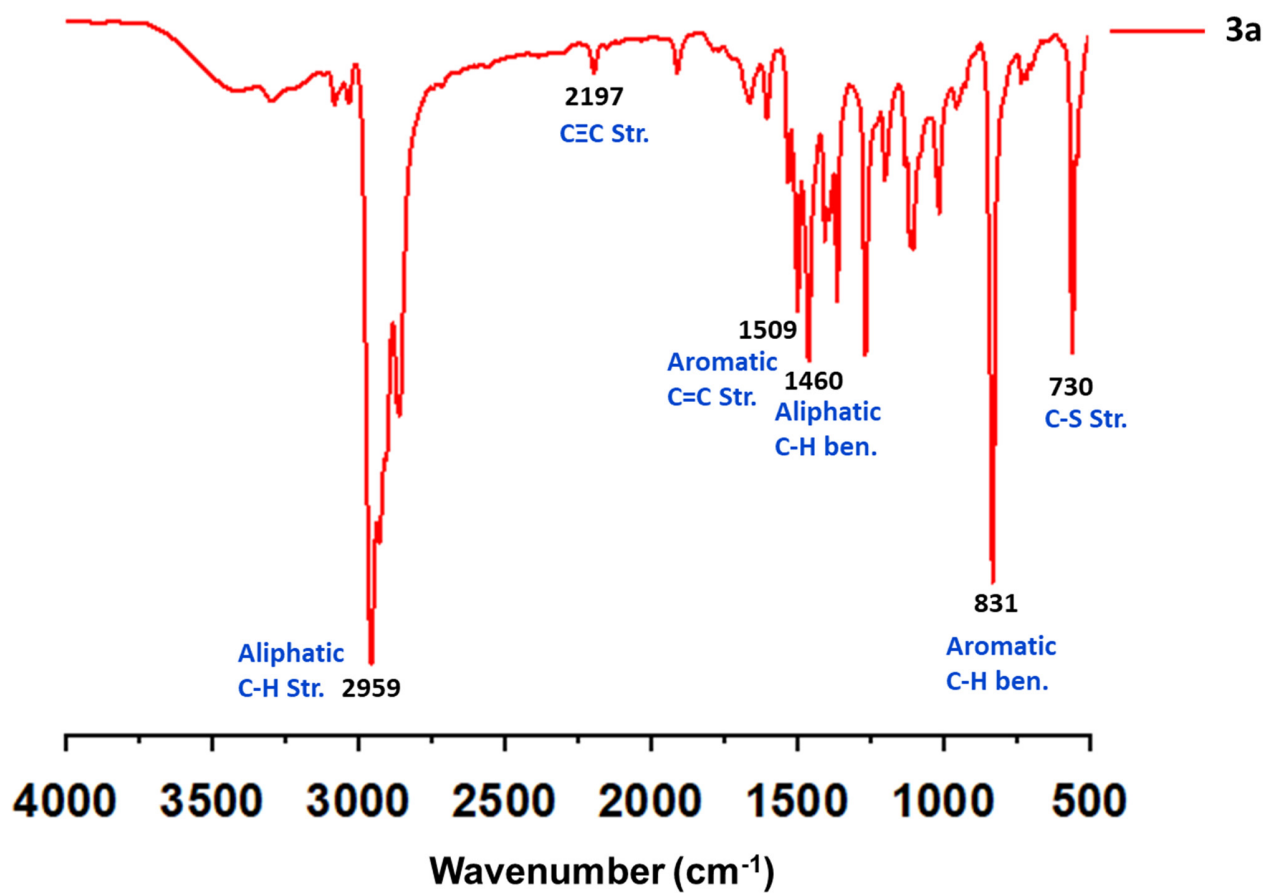

Figure S15 FTIR spectrum of 3a

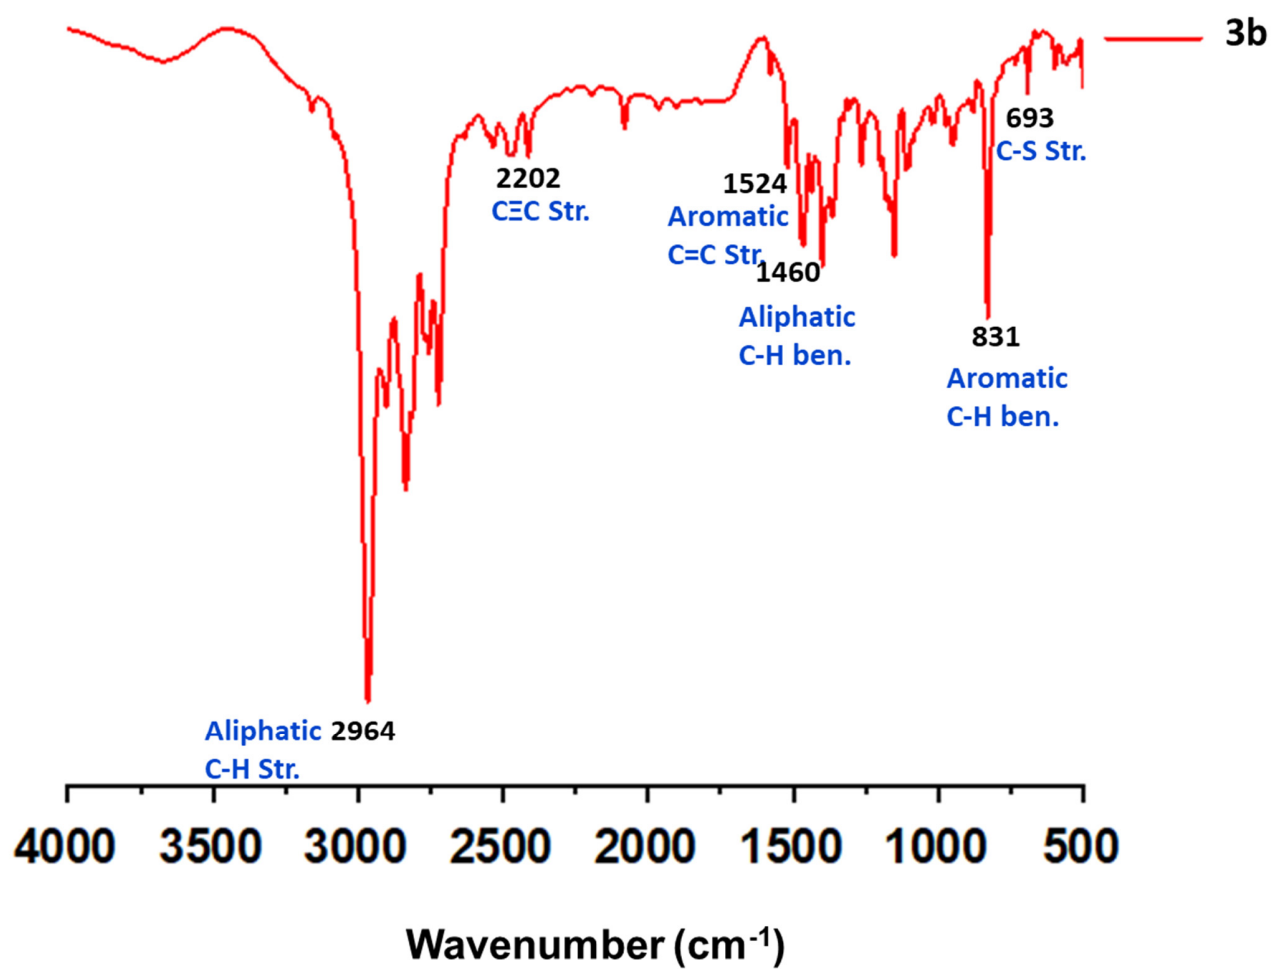

Figure S16 FTIR spectrum of 3b

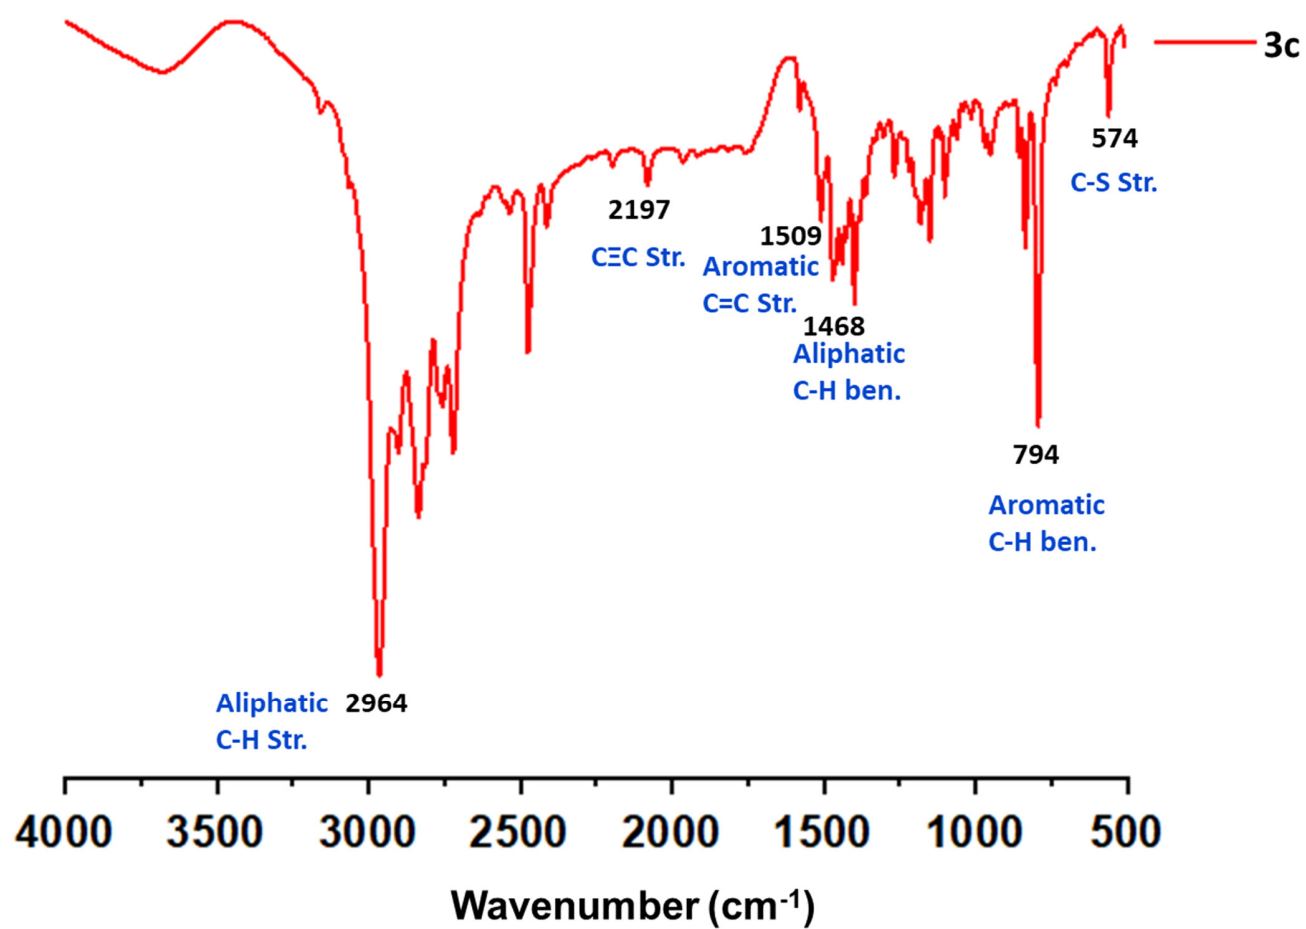

Figure S17 FTIR spectrum of 3c

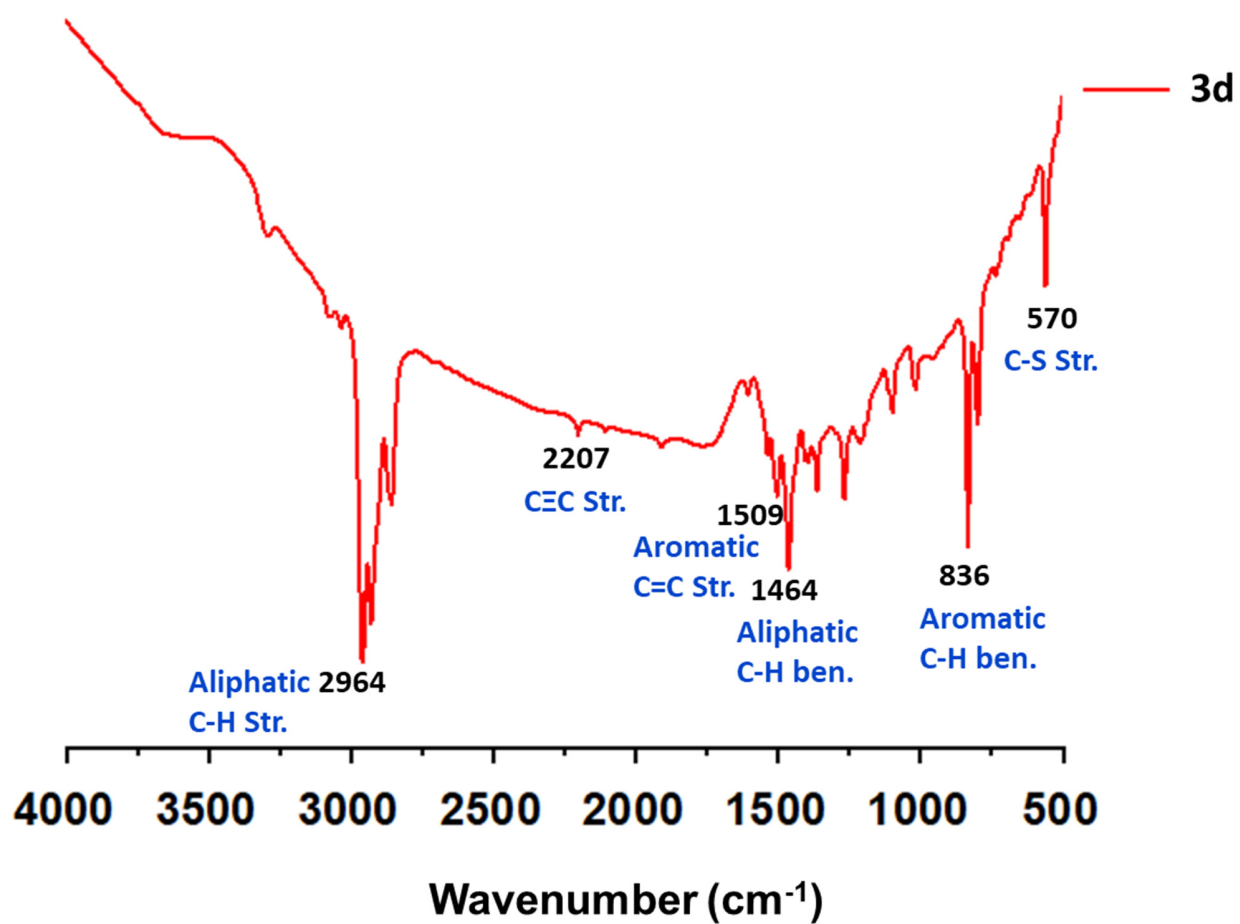

Figure S18 FTIR spectrum of 3d



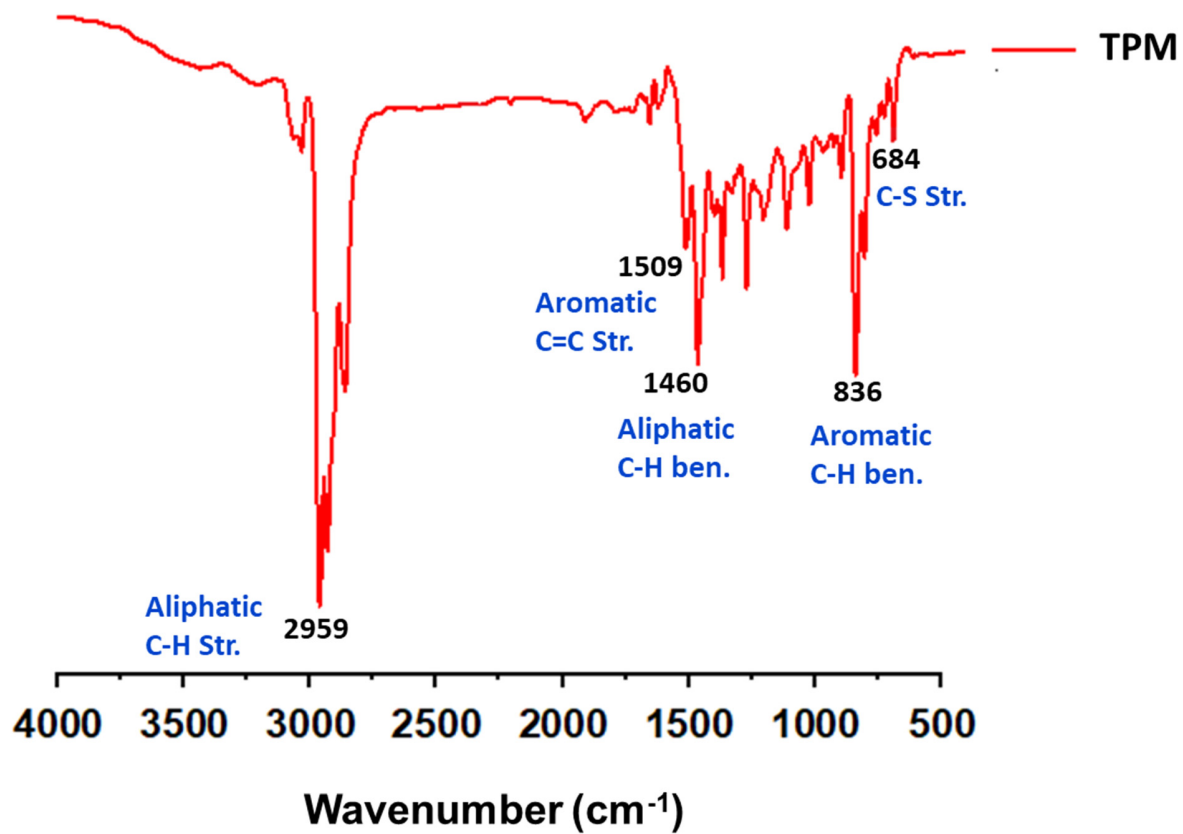

Figure S19 FTIR spectrum of TPM

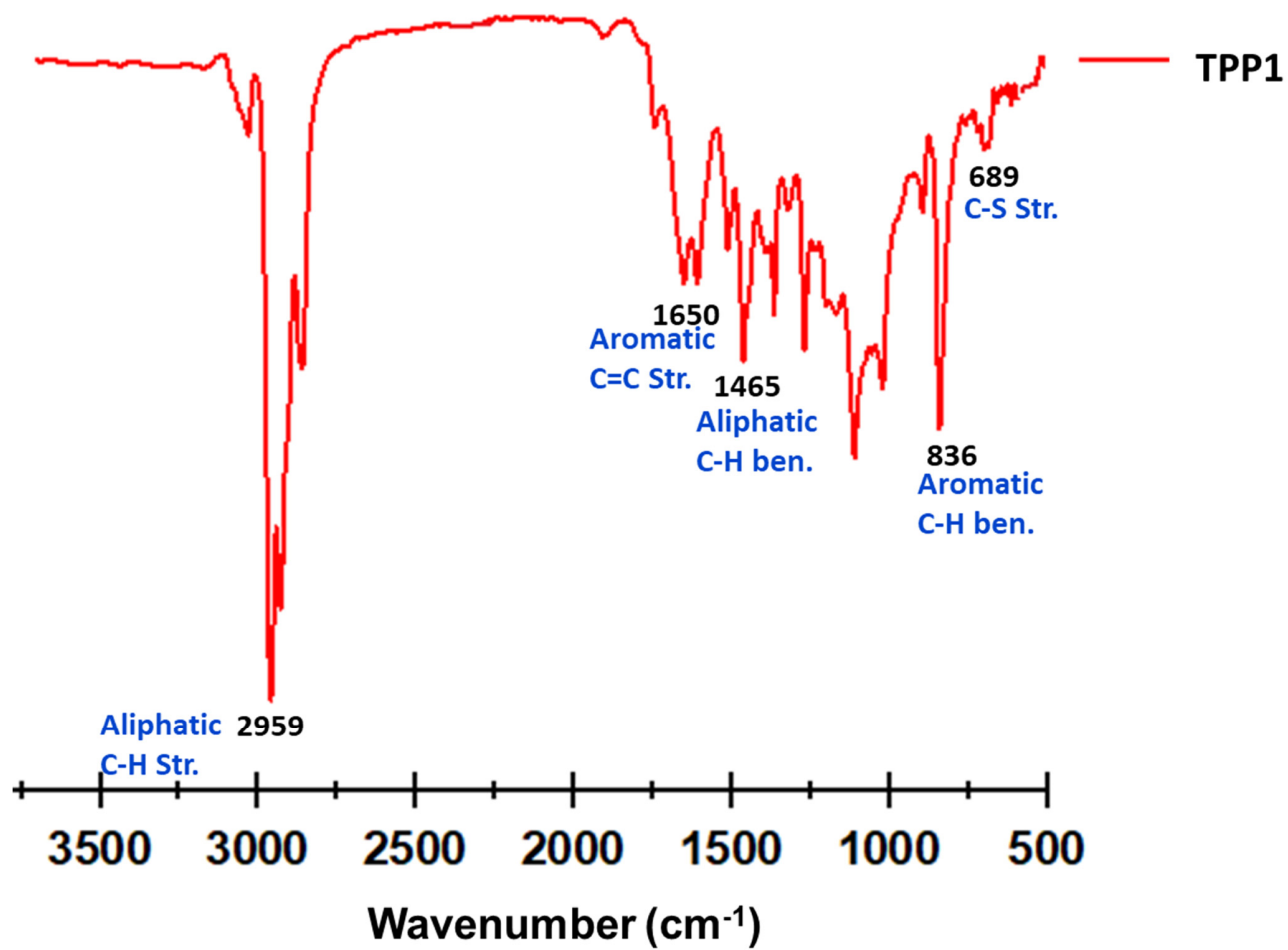

Figure S20 FTIR spectrum of TPP1

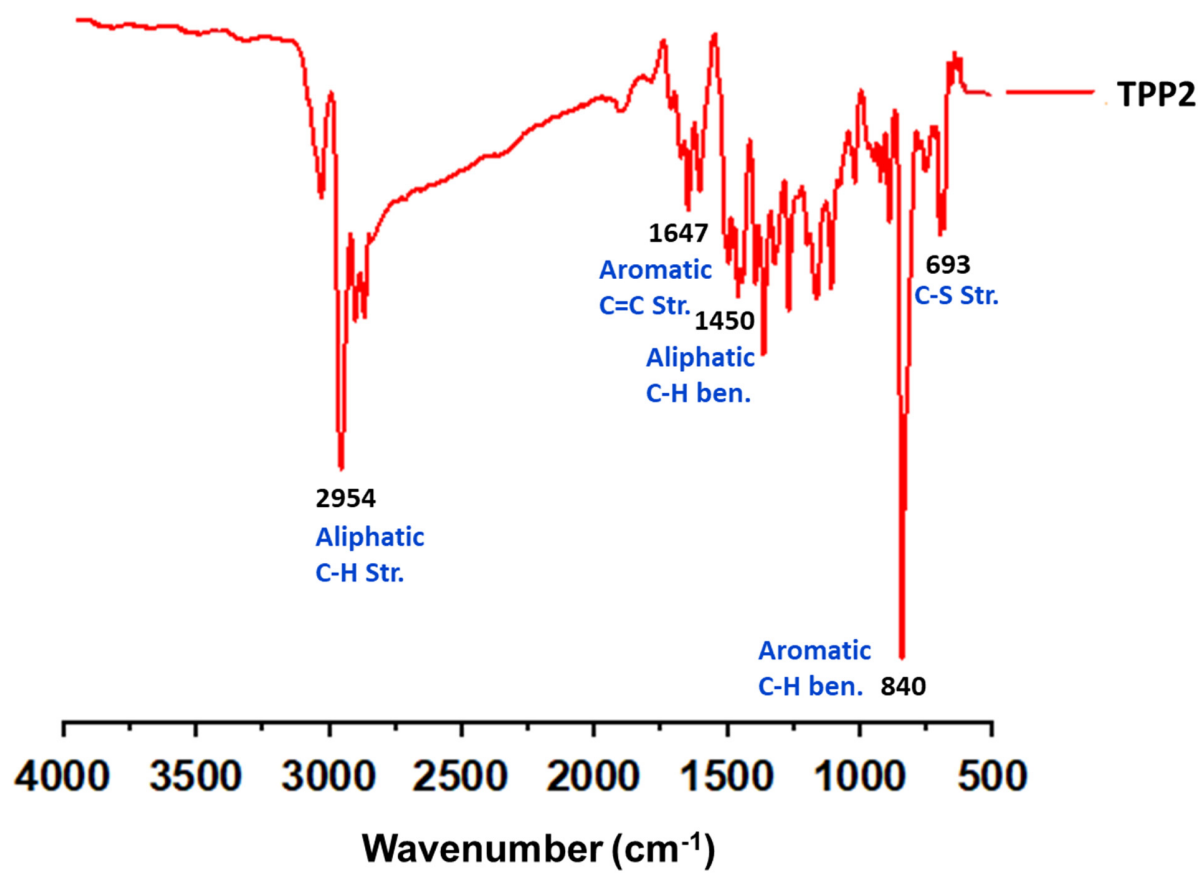

**Figure S21** FTIR spectrum of **TPP2**

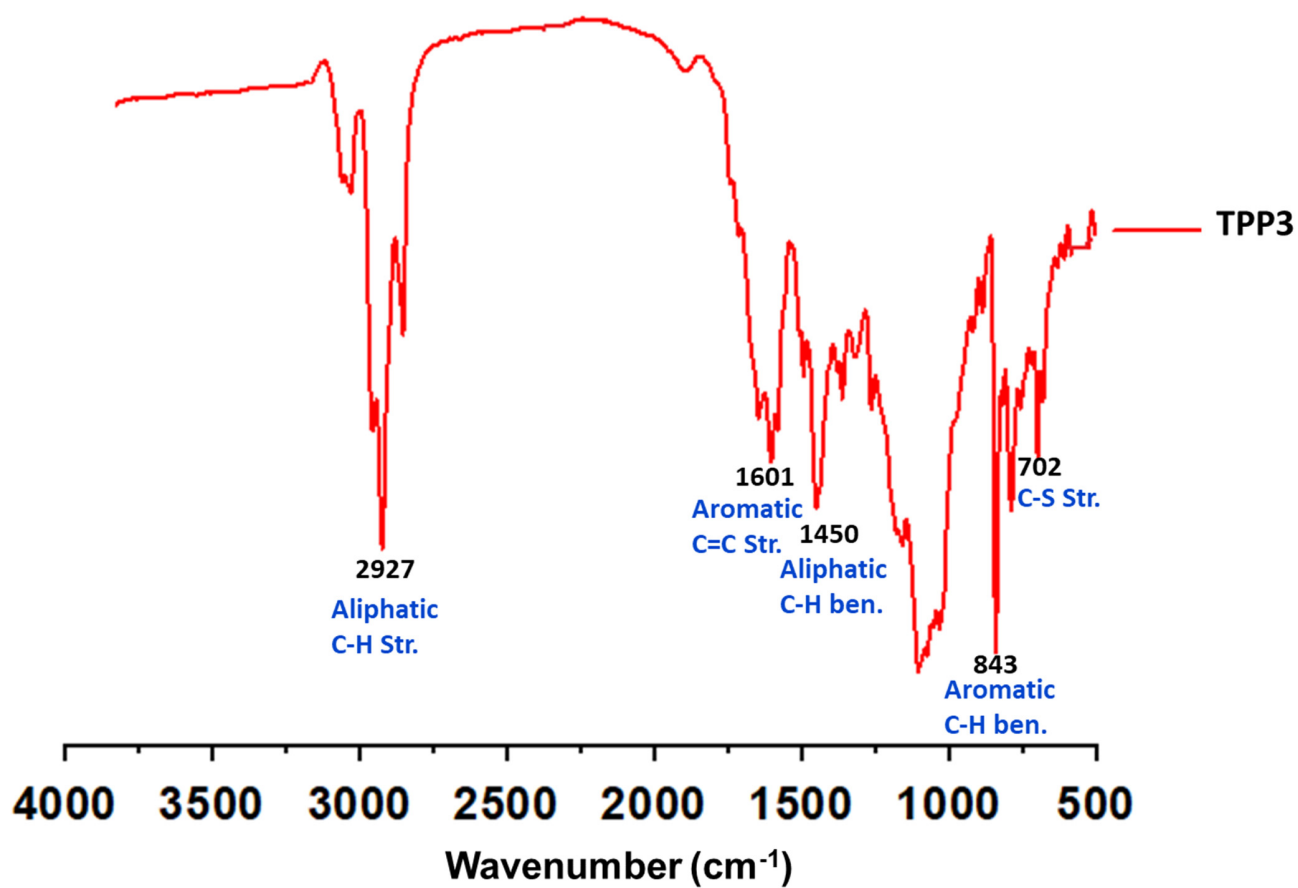

Figure S22 FTIR spectrum of TPP3

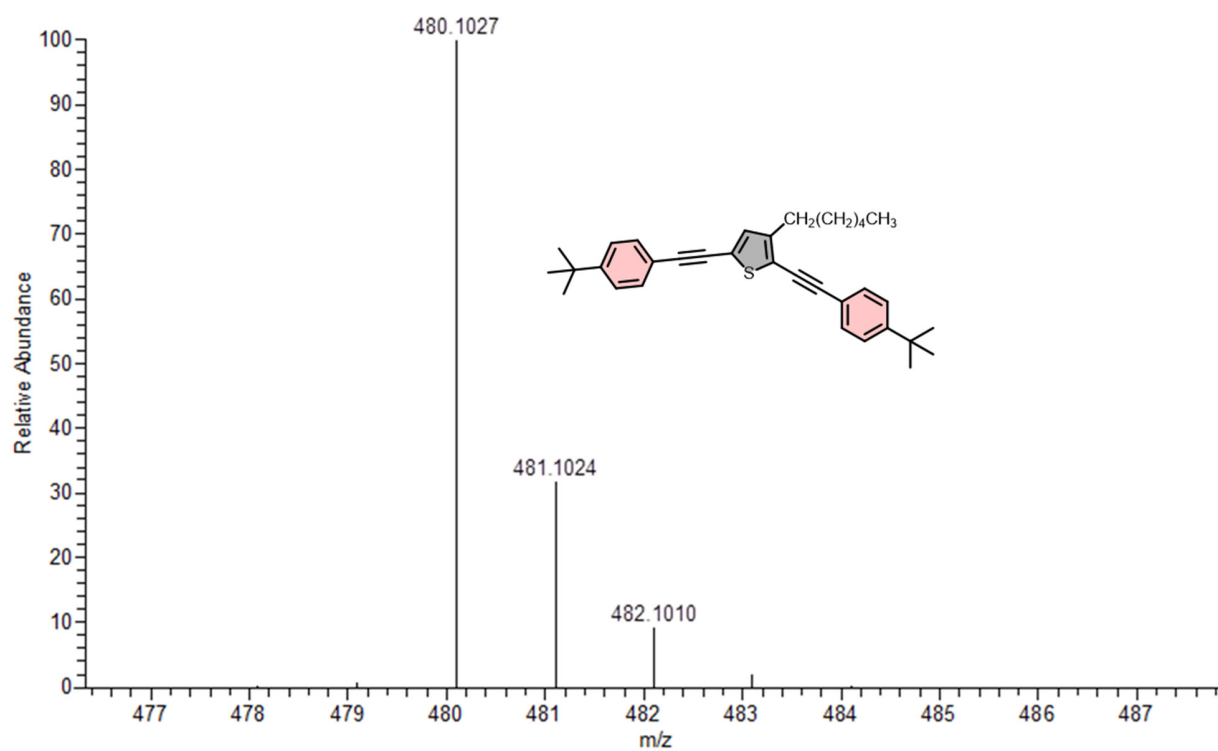

**Figure S23** EI-HRMS spectrum of **3a**

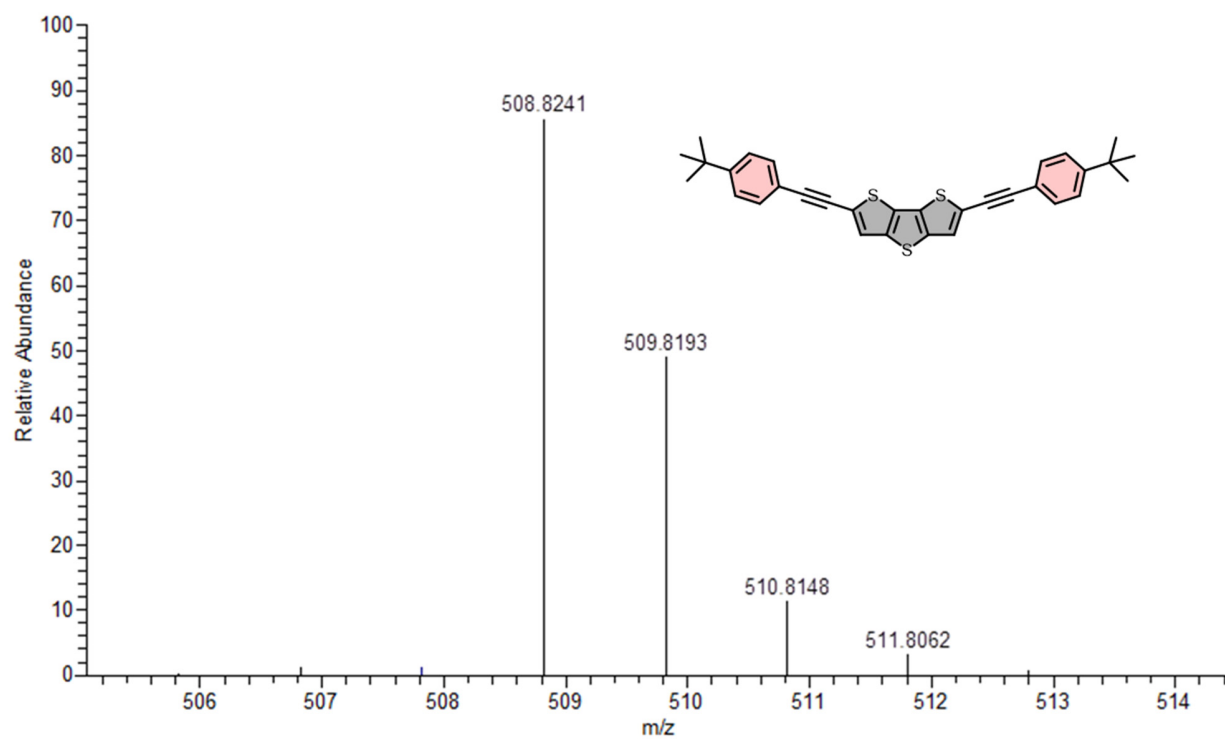

**Figure S24** ESI-HRMS spectrum of **3b**

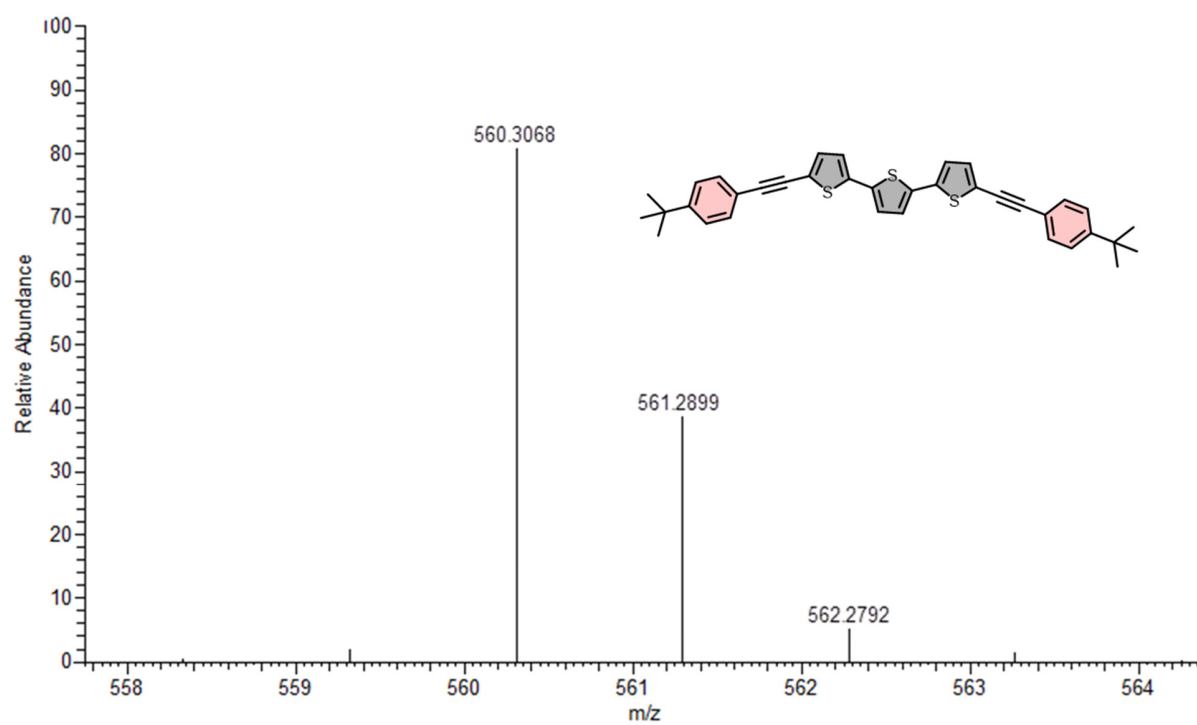

**Figure S25** ESI-HRMS spectrum of **3c**

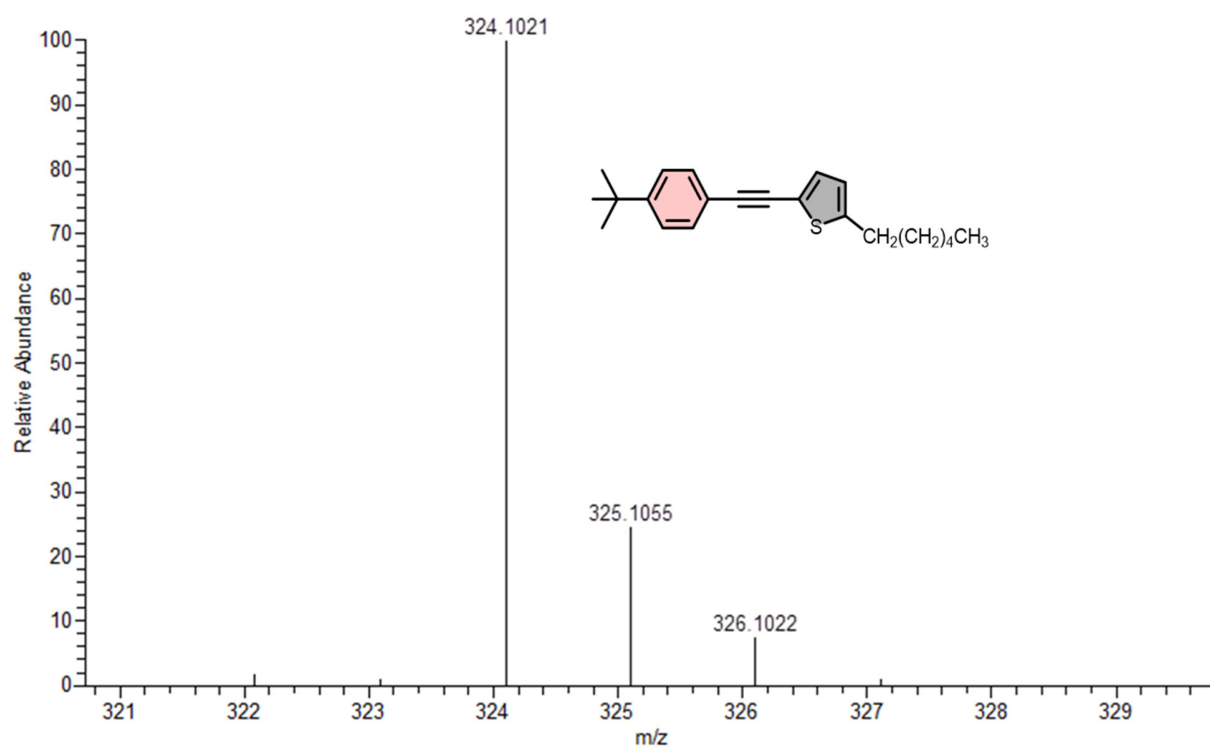

**Figure S26** ESI-HRMS spectrum of **3d**



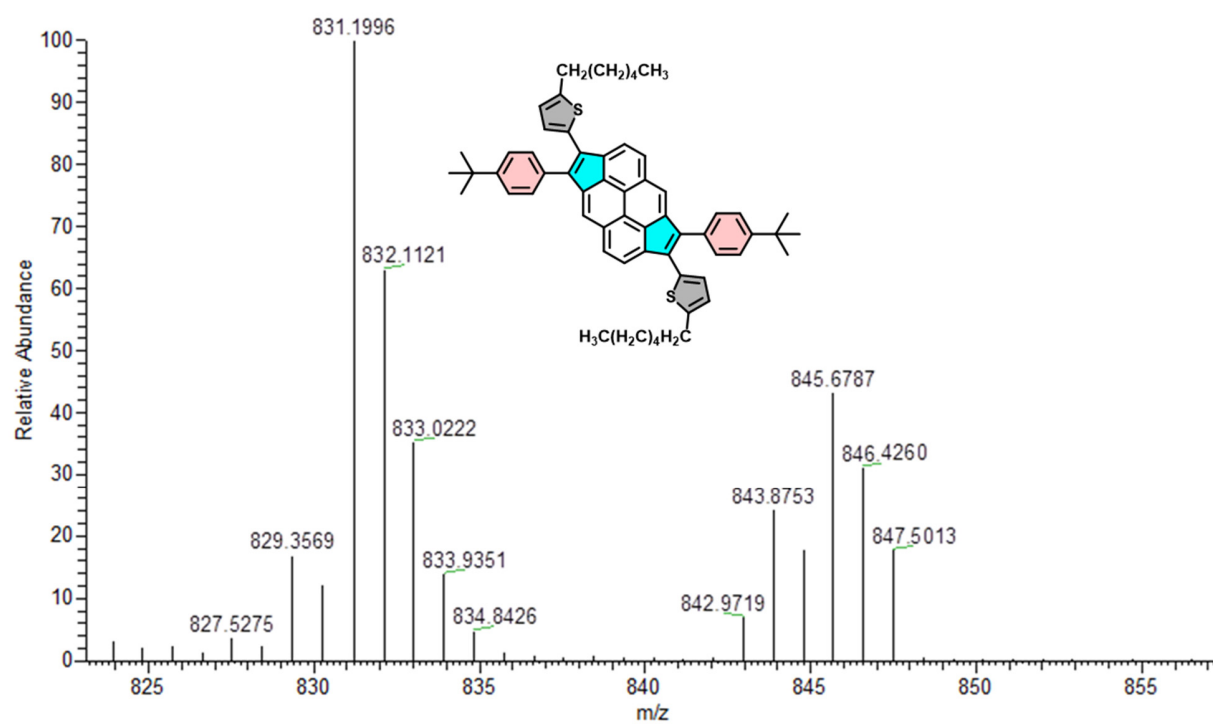

**Figure S27** ESI-HRMS spectrum of **TPM**

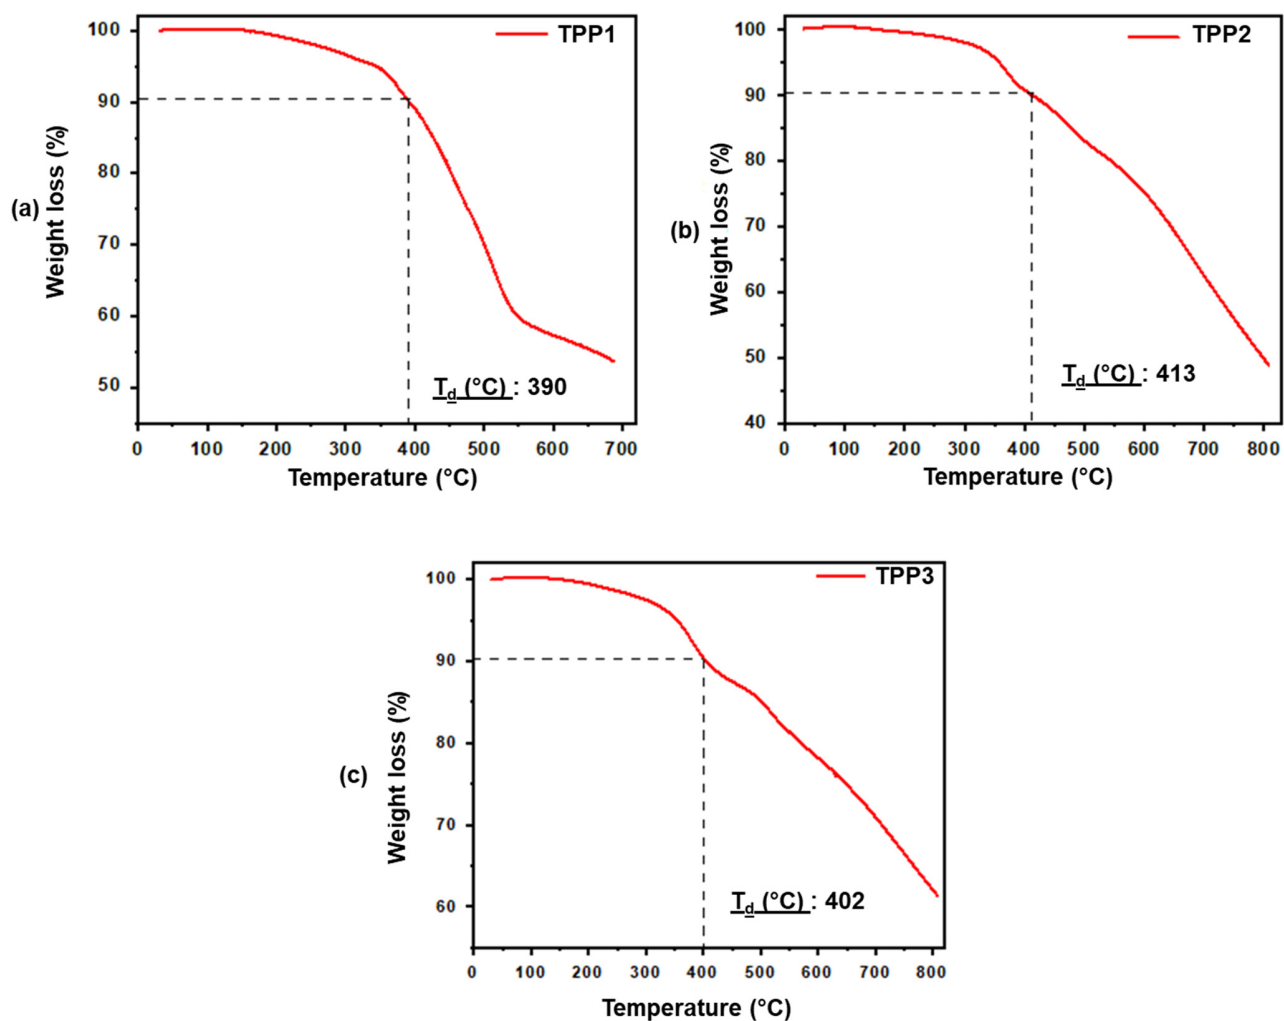

**Figure S28** TGA thermograms of (a) TPP1, (b) TPP2 and (c) TPP3,  $T_d$  represents the temperature of 10% weight loss

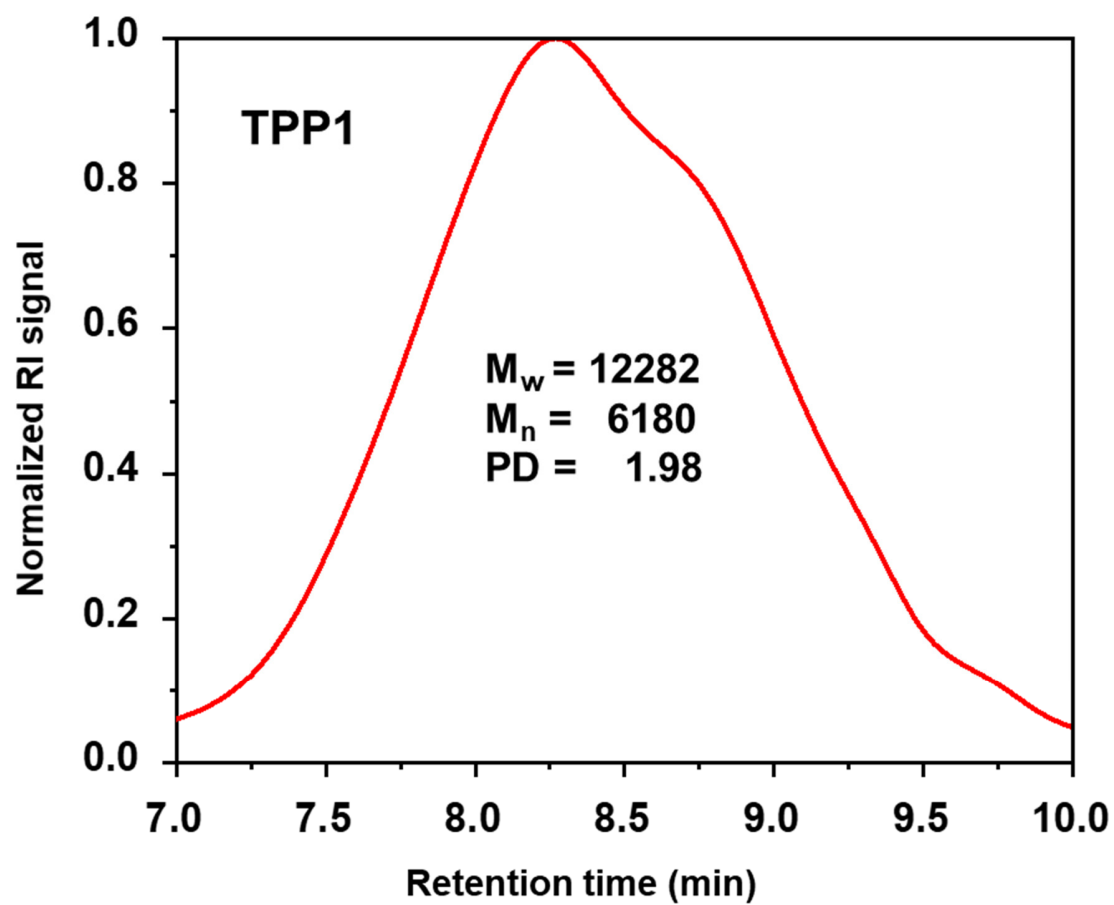

Figure S29 Normalized GPC chromatogram TPP1

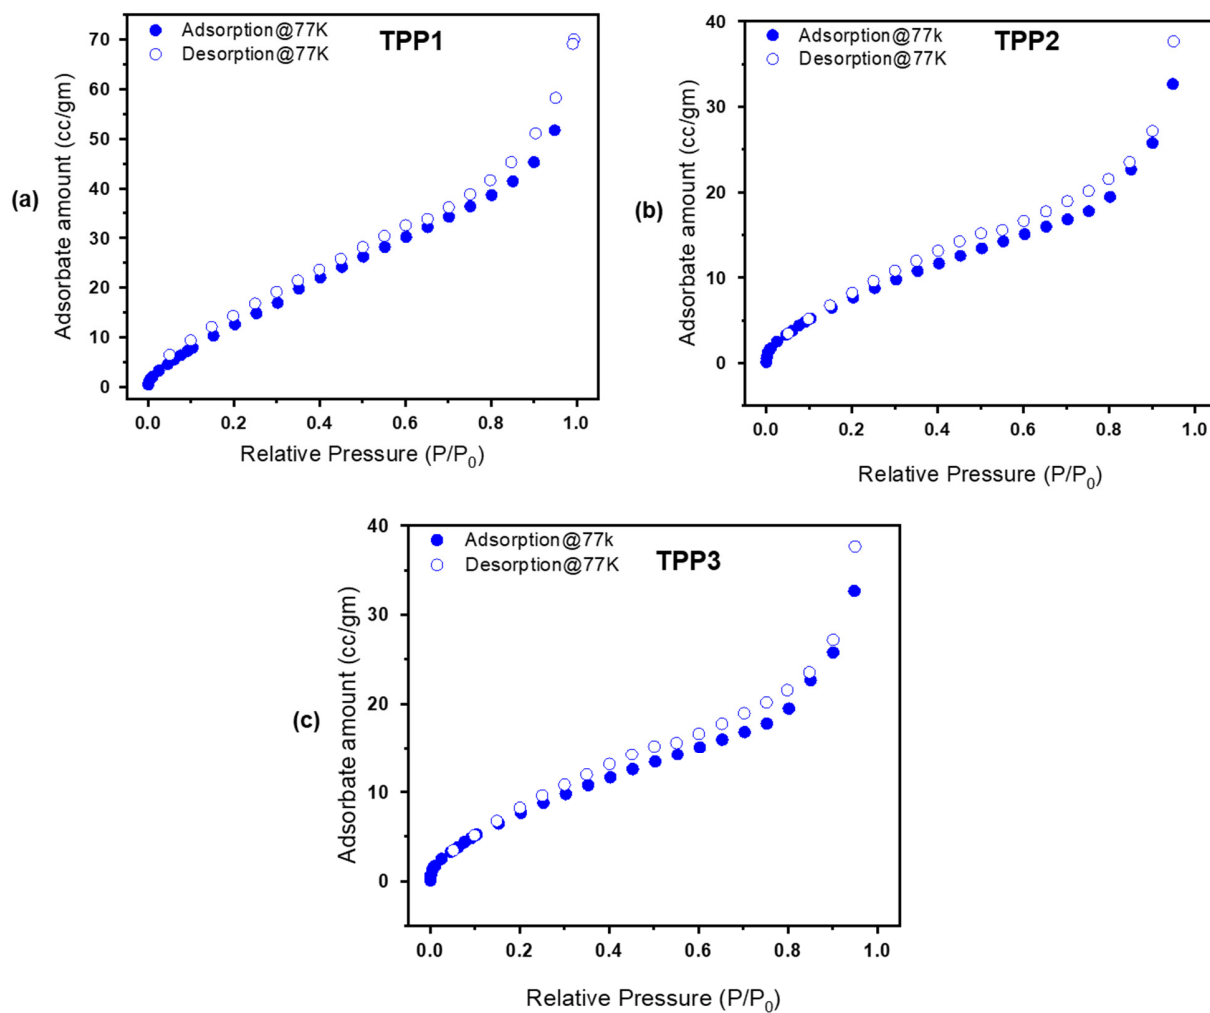

**Figure S30** Nitrogen adsorption and desorption isotherms of (a) **TPP1**, (b) **TPP2** and (c) **TPP3** measured at 77 K.

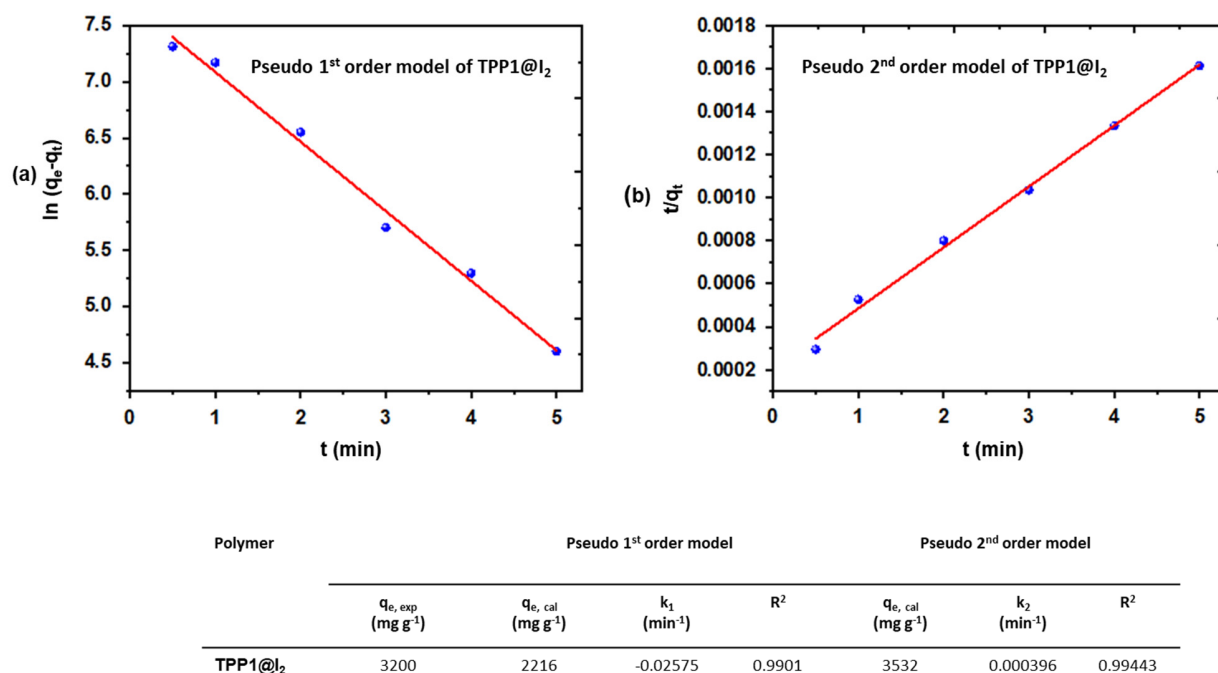

**Figure S31** Pseudo-first-order (a) and pseudo-second-order (b) models of TPP1@I<sub>2</sub>

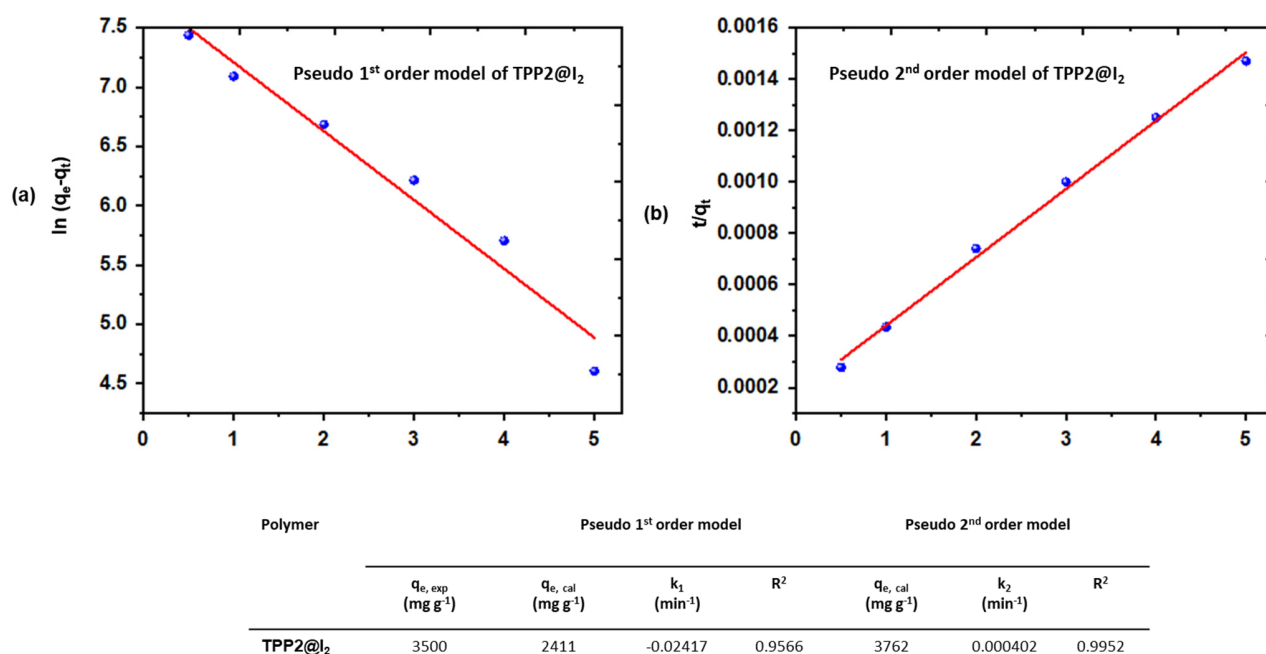

**Figure S32** Pseudo-first-order (a) and pseudo-second-order (b) models of TPP2@I<sub>2</sub>

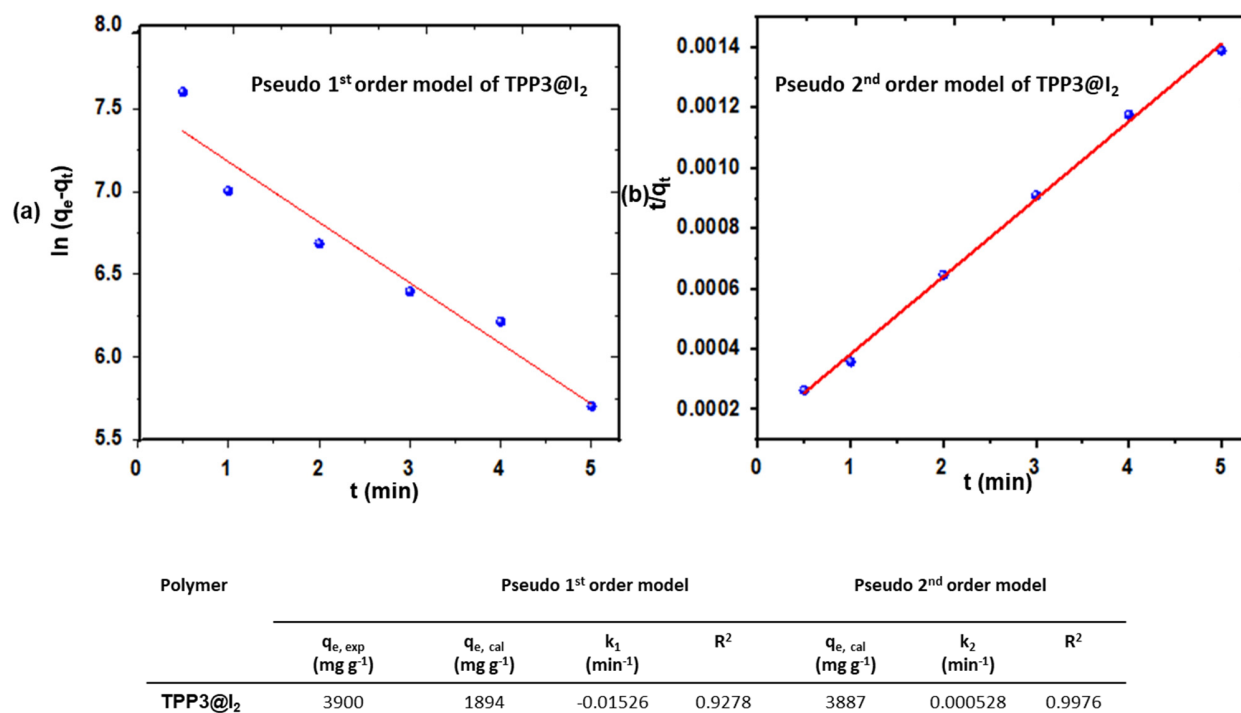

**Figure S33** Pseudo-first-order (a) and pseudo-second-order (b) models of TPP3@I<sub>2</sub>

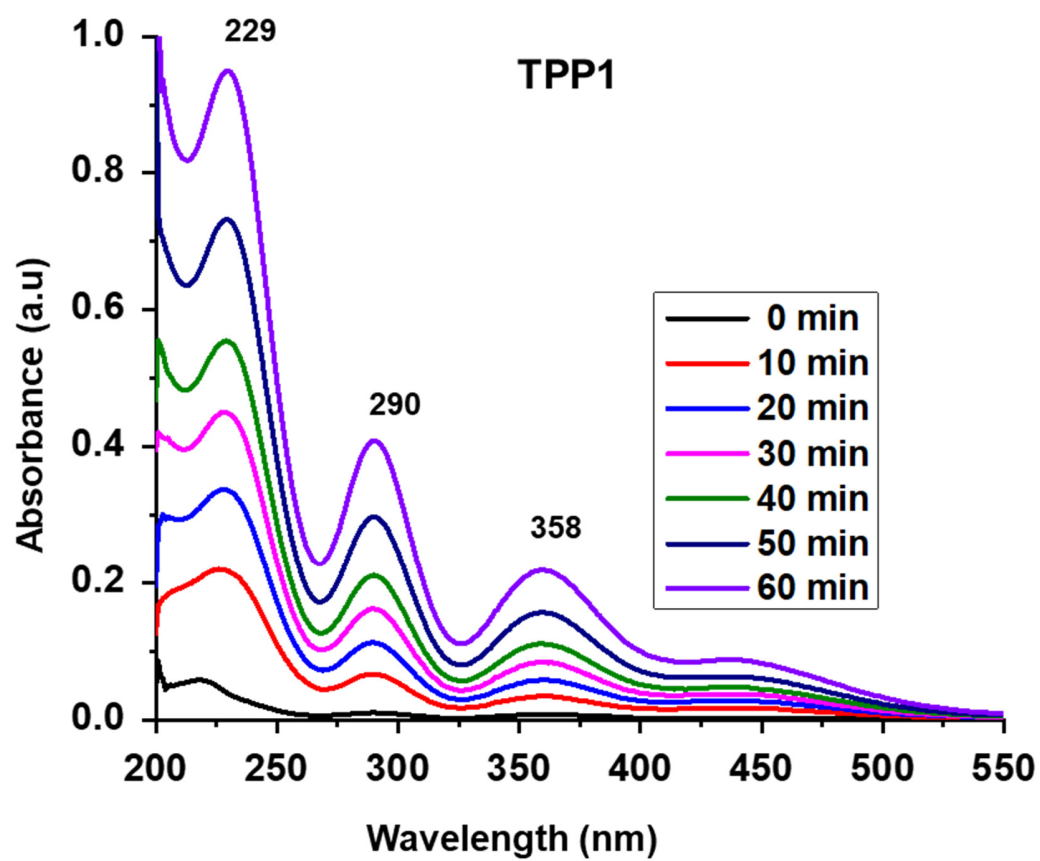

**Figure S34** UV-Vis absorption spectra upon immersion of **TPP1@I<sub>2</sub>** in ethanol

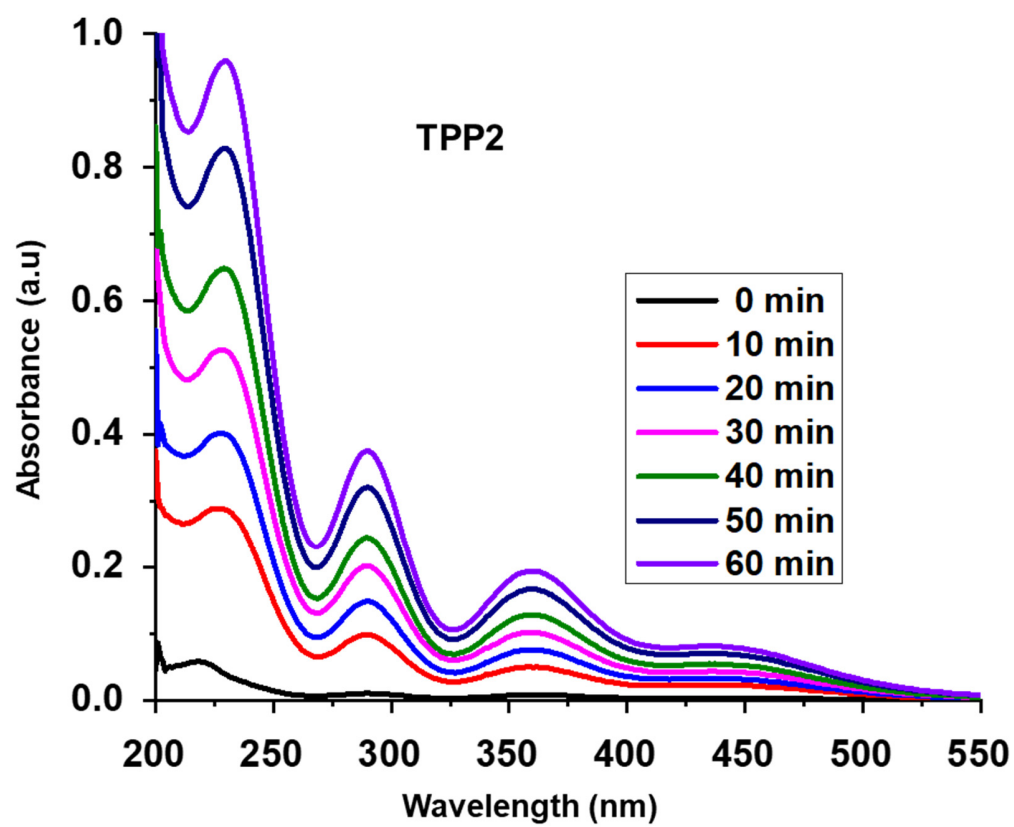

**Figure S35** UV-Vis absorption spectra upon immersion of **TPP2@I<sub>2</sub>** in ethanol



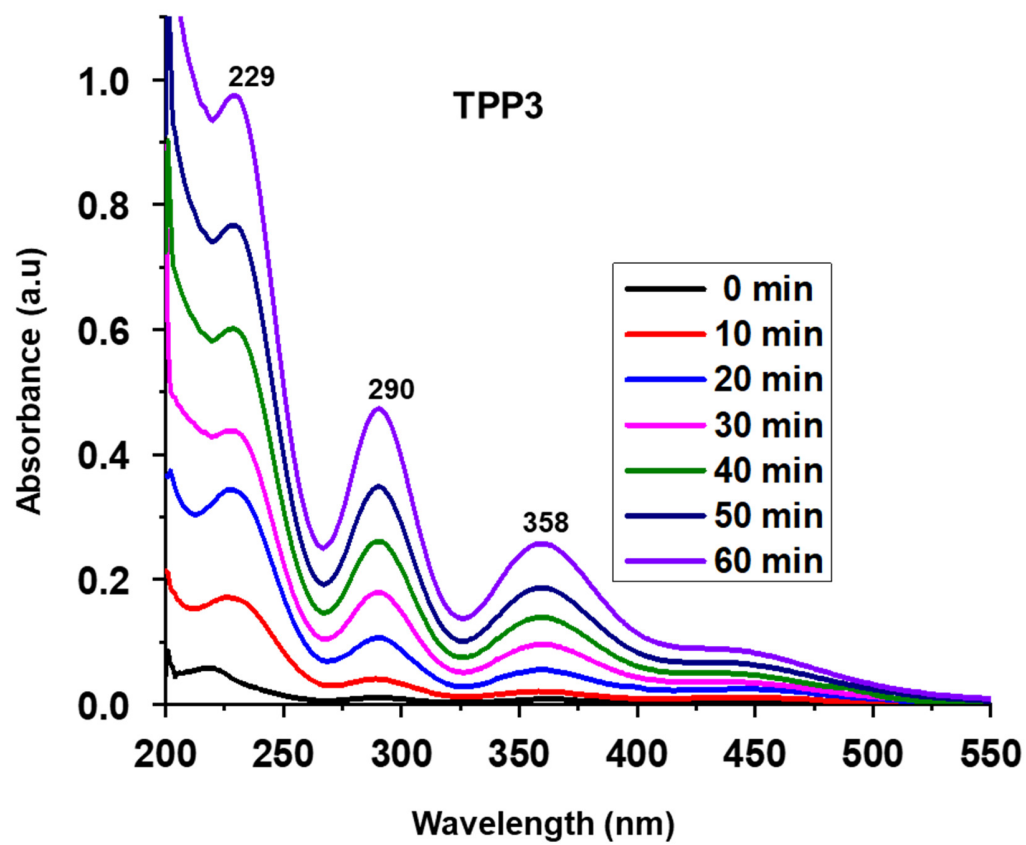

**Figure S36** UV-Vis absorption spectra upon immersion of **TPP3@I<sub>2</sub>** in ethanol
